1 **EMBO JOURNAL**

2

3 **The final character count 102 696.**

4 **Activation of NLRP3 Inflammasome by Virus-like Particles of Human Polyomaviruses**  
5 **in Macrophages**

6 Asta Lučiūnaitė,<sup>1\*</sup> Indrė Dalgėdienė,<sup>1</sup> Rapolas Žilionis,<sup>1,2</sup> Kristina Mašalaitė,<sup>1</sup> Milda  
7 Norkienė,<sup>1</sup> Andrius Šinkūnas,<sup>2</sup> Alma Gedvilaitė,<sup>1</sup> Indrė Kučinskaitė-Kodžė<sup>1</sup> and Aurelija  
8 Žvirblienė<sup>1</sup>

9 <sup>1</sup>Institute of Biotechnology, Life Sciences Center, Vilnius University, Vilnius, Lithuania  
10 <sup>2</sup>Droplet Genomics, Vilnius, Lithuania

11 \*Corresponding author, should be addressed to Asta Lučiūnaitė, [asta.luciunaite@bti.vu.lt](mailto:asta.luciunaite@bti.vu.lt)

12 **Abstract**

13 Viral antigens can activate phagocytes inducing inflammation but the mechanisms are  
14 barely explored. This study aimed to investigate the capability of viral oligomeric proteins of  
15 different structure to induce inflammatory response in macrophages. Human THP-1 cell line  
16 was used to prepare macrophages which were treated with filamentous nucleocapsid-like  
17 particles (NLPs) of paramyxoviruses and spherical virus-like particles (VLPs) of human  
18 polyomaviruses. The effects of viral proteins on cell viability, pro-inflammatory cytokines'  
19 production and formation of NLRP3 inflammasome components, ASC specks, were  
20 investigated. Filamentous NLPs did not induce inflammation markers while spherical VLPs  
21 mediated inflammatory response followed by NLRP3 inflammasome activation. Inhibitors of  
22 cathepsins and K<sup>+</sup> efflux decreased IL-1β levels and cell death indicating a complex  
23 inflammasome activation process. Similar activation pattern was observed in primary human  
24 macrophages treated with VLPs. Single cell RNAseq analysis of THP-1 cells revealed several  
25 cell activation states characterized by high expression of inflammation-related genes. This  
26 study provides new insights into interaction of viral proteins with innate immune cells and  
27 suggests that structural properties of oligomeric proteins may define cell activation pathways.

28 **Keywords:** macrophage/polyomavirus/NLRP3 inflammasome/cathepsins

29 **Introduction**

30 The components of innate immunity such as macrophages play a key role in the onset  
31 and progression of inflammatory and age-related diseases (Oishi & Manabe, 2016; Parisi *et*  
32 *al*, 2018). Macrophages are considered as a potential target for treatment of many diseases,  
33 therefore, molecular mechanisms related to their activation is currently at the top of research  
34 (Zhang *et al*, 2021). Besides, macrophages are known to recognize the structural properties of  
35 the activation agents and influence the inflammatory response via inflammasome activation  
36 (Rabolli *et al*, 2016a; Shu & Shi, 2018). Inflammasomes are intracellular protein complexes  
37 representing important components of the innate immune system (de Alba, 2019). The best  
38 described representative is NLRP3 inflammasome. It contains three major components –  
39 nucleotide-binding and oligomerization domain-like receptor, apoptosis-associated speck-like  
40 protein containing CARD (ASC) and pro-caspase-1. NLRP3 inflammasome assembly results  
41 in IL-1β release and inflammatory cell death – pyroptosis (Swanson *et al*, 2019). Endogenous

42 and external factors can trigger its assembly. Its assembly can be triggered by endogenous  
43 and external factors. Activation of NLRP3 inflammasome is associated with various diseases,  
44 including gout and Alzheimer's disease (Fusco *et al*, 2020). Our previous study showed that  
45 NLRP3 inflammasome is activated by amyloid beta (A $\beta$ ), both oligomers and protofibrils  
46 (Luciunaite *et al*). Inflammasome activation was also induced by  $\alpha$ -synuclein (Codolo *et al*,  
47 2013), and tau oligomers (Ising *et al*, 2019). However, the most explored inflammasome  
48 triggers are polymeric nanoparticles (Doshi & Mitragotri, 2010), cholesterol crystals  
49 (Samstad *et al*, 2014), airborne pollutants such as silica (Dostert *et al*, 2008). The structural  
50 properties of synthetic nanoparticles determine the outcome of cell activation (Baranov *et al*,  
51 2020). Previously, we have demonstrated that spherical oligomeric proteins of viral origin  
52 induce inflammatory responses in macrophages but the mechanism and molecular  
53 components of this process are not yet confirmed (Dalgediene *et al*, 2018). In addition,  
54 another study demonstrated that the nucleocapsid (N) protein of Zika virus activated the  
55 inflammasome (Wang *et al*, 2018). Repetitive and latent viral infections are potential agents  
56 of inflammation (Maloney *et al*, 2013). This frame of reference draws attention to the latent  
57 viral infections and their role in inflammation.

58 It is well known that some viruses lie dormant within the host after an acute infection.  
59 According to World Health Organisation, 50-80% of world population is infected by  
60 polyomaviruses (PyVs) in the childhood (De Gascun & Carr, 2013). The effects of these  
61 viruses and their antigens on innate immunity throughout the life are not fully understood.  
62 For example, herpes virus in its latent form can cause multisymptom illness with a broad  
63 range of simultaneous symptoms, such as cognitive disorders, depression, fatigue (Maloney  
64 *et al.*, 2013). However, the mechanism of multisymptomatic illness is unclear. Investigation  
65 of inflammatory responses induced by proteins of viruses causing acute and latent infection  
66 may indicate whether these viral proteins alone are capable of activating the immune system.  
67 Moreover, VLPs are already established as carriers and adjuvants in vaccines. Components of  
68 vaccines can activate the inflammasome as it was reported for the ISCOMATRIX adjuvant  
69 (Wilson *et al*, 2014). Studying how different viral proteins especially VLPs stimulate the  
70 immune cells would allow the selection of better tools for vaccination.

71 Inflammatory reactions induced by synthetic polymeric particles in macrophages vary  
72 depending on their size and shape (Shu & Shi, 2018; Rabolli, 2016). Similarly, viral proteins  
73 may also fate cellular response depending on their structural properties. Our study was aimed  
74 to investigate how recombinant viral proteins induce inflammatory response in macrophages  
75 focusing on inflammasome activation. The VLPs derived from major capsid protein VP1 of  
76 human PyVs – Karolinska Institute (KI) PyV and Merkel cell (MC) PyV, self-assembling to  
77 spherical particles about 20-60 nm in diameter (Norkiene *et al*, 2015b), were selected as  
78 typical representatives of spherical oligomeric proteins. The NLPs of measles and mumps  
79 viruses were chosen as a model of oligomeric proteins forming filamentous rod-shaped  
80 structures (Samuel *et al*, 2003; Zvirbliene *et al*, 2007). We showed that inflammatory  
81 responses and activation of NLRP3 inflammasome in macrophages depend on the structural  
82 properties of viral proteins. This study provides new insights on the ability of multimeric  
83 viral antigens to induce inflammatory response in innate immune cells.

## 84 **Results**

85 We investigated the ability of viral multimeric proteins to induce inflammatory  
86 response in macrophages focusing on inflammasome activation. For this study, we have  
87 selected structurally diverse viral proteins: filamentous NLPs of measles and mumps viruses  
88 (*Paramyxoviridae* family) that usually cause acute infections, and spherical VLPs derived  
89 from VP1 of PyVs (*Polyomaviridae* family) that generally induce latent viral infections. We

90 also investigated whether viral oligomeric proteins of diverse structure can determine  
91 different patterns of cell activation.

### 92 **NLPs did not activate THP-1 macrophages despite their interaction with the cells**

93 First at all, we investigated the uptake of viral proteins by THP-1 macrophages. The  
94 cells were treated with recombinant NLPs of measles and mumps viruses, as well as  
95 recombinant VLPs of PyVs, for 24 h to observe the uptake of multimeric viral proteins. The  
96 NLPs and VLPs were immunostained with the respective monoclonal antibodies. We also  
97 immunostained the cells for the macrophage and lysosomal marker CD68. The uptake of both  
98 NLPs and VLPs was detected microscopically demonstrating their interaction with THP-1  
99 macrophages (Fig 1).

100 To investigate macrophage activation by multimeric viral proteins, we started with  
101 recombinant NLPs of measles and mumps viruses forming filamentous structures. These  
102 NLPs are long rod-shaped structures, about 20 nm in diameter, mimicking the nucleocapsids  
103 of native viruses (Samuel *et al*, 2002a; Slibinskas *et al*, 2004). Treatment of THP-1  
104 macrophages with recombinant NLPs did not cause any inflammatory response according to  
105 TNF- $\alpha$  release data (Fig 2A). The NLPs also did not activate the inflammasome as no change  
106 in IL-1 $\beta$  (Fig 2B) and lactate dehydrogenase (LDH) release (Fig 2C) was detected. In  
107 addition, the investigated viral proteins were not cytotoxic according to propidium iodide (PI)  
108 and Hoechst nuclear staining assay (Fig 2D and E). We concluded that recombinant NLPs did  
109 not induce the inflammatory response in THP-1 macrophages.

### 110 **PyV-derived VLPs induced inflammatory response followed by NLRP3 inflammasome** 111 **activation in THP-1 macrophages**

112 Next, we investigated macrophage activation by PyV-derived VLPs of spherical  
113 structures that are similar to native viruses in their shape and size. In order to evaluate the  
114 effects of diverse VLPs we have selected PyV-derived VLPs of different sizes, ranging 20-60  
115 nm in diameter (Norkiene *et al*, 2015a). KIPyV-derived VP1 proteins form heterogeneous  
116 particles, ranging from 20 to 60 nm, while MCPyV-derived VP1 proteins form more  
117 homogenous VLPs, 45-50 nm in diameter. Thus, we investigated VLPs of different sizes.  
118 Treatment of human THP-1 macrophages with PyV-derived VLPs induced cell activation and  
119 inflammatory response according to TNF- $\alpha$  and IL-6 release (Fig 3A and B). Therefore, we  
120 assumed that VLPs activated the NF $\kappa$ - $\beta$  signalling pathway, which could be a priming step  
121 for further inflammasome activation. In addition, we assayed the cells for anti-inflammatory  
122 cytokine IL-10 secretion and did not detect its release after VLP treatment (detected IL-10  
123 values were below the assay detection limit, so, equalised 0). PyV-derived VLPs induced not  
124 only secretion of inflammatory cytokines but also provoked cell death as LDH release was  
125 increased (Fig 3D) and dead cells were detected using PI staining (Fig 3E). We also  
126 demonstrated that VLPs of different sizes induced cell activation signal of different strength.  
127 Large-sized (45-50 nm in diameter) homogenous VLPs of MCPyV induced higher  
128 inflammatory response as compared to heterogeneous KIPyV-derived VLPs (Fig 3).

129 Then, we assessed whether PyV-derived VLPs induce activation of NLRP3  
130 inflammasome in THP-1 macrophages. To test this, we used a small molecule MCC950  
131 which specifically inhibits NLRP3 inflammasome. PyV-derived VLPs induced cell death

132 (Fig 3D-F) and IL-1 $\beta$  release showing inflammasome activation (Fig 3C). Pre-treatment with  
133 MCC950 inhibitor before adding the VLPs significantly decreased this activation signal (Fig  
134 3C-F). The inhibitor MCC950 did not influence the secretion level of other inflammatory  
135 cytokine TNF- $\alpha$  showing the specificity of inhibitor to inflammasome activation (Fig 3A).  
136 These data demonstrate that PyV-derived VLPs are potent inflammatory agents triggering  
137 inflammatory cytokine secretion and pyroptotic cell death.

138 In the next step, we investigated the formation of ASC specks that would indicate the  
139 assembly of the inflammasome. To detect ASC specks, we used THP-1-ASC-GFP  
140 macrophages. We identified ASC specks after treating cells with PyV-derived VLPs (Fig 4).  
141 However, MCC950 did not fully inhibit ASC speck formation (Fig 4B), which might be  
142 explained by ASC speck release from the inflammasome-activated cells. Secreted ASC  
143 specks can promote further maturation of inflammatory cytokines (Franklin *et al*, 2018). In  
144 addition, ASC specks could induce a subsequent inflammatory response by activating the  
145 surrounding cells.

146 Next, we performed time-lapse experiments to observe the dynamics of cell activation  
147 by PyV-derived VLPs. We measured LDH release in wild-type THP-1 cells treated with  
148 PyV-derived VLPs for 15-23 h. There were no differences in LDH release within this time  
149 interval (Fig 4C). We also took the fluorescent microscopy images of THP-1-ASC-GFP after  
150 14-24 h treatment with VLPs. Again, we did not find considerable differences within the 14-  
151 24 h treatment period (Fig 4D). All cells were similar according to fluorescence intensity. We  
152 concluded that THP-1 macrophages are activated at about 15 h after VLP addition and their  
153 activation pattern remains constant from this time point.

154 To prove VLP-induced activation of the inflammasome, we assayed for active  
155 caspase-1, which is a major component of the inflammasome cascade, converting pro-IL-1 $\beta$   
156 to its mature form. Having the time lapse experiment data, we collected cell culture  
157 supernatant for caspase-1 assay after 15 h – from the steady cell activation time point in order  
158 not to lose the active enzyme. The cleaved caspase-1 p20 fragment was immunodetected by  
159 WB after THP-1 treatment with VLPs (Fig 5A). NLRP3 inhibitor MCC950 reduced  
160 generation of the activated caspase-1. Then, we analysed caspase-1 activation at a single-cell  
161 level using FLICA reagent. It contains FAM-YVAD-FMK caspase-1 inhibitor probe, which  
162 covalently binds to only activated caspase-1. We revealed caspase-1 activation in some THP-  
163 1 macrophages after treatment with PyV-derived VLPs (Fig 5B). Large-sized MCPyV-  
164 derived VLPs induced a stronger response as compared to KIPyV-derived VLPs.  
165 Inflammasome inhibitor MCC950 reduced the level of activated caspase-1. We also stained  
166 VLP-treated cell cultures with PI to identify dead cells. Activated caspase-1 co-localised with  
167 dead cells confirming the pyroptotic cell death. Therefore, we concluded that PyV-derived  
168 VLPs induce inflammasome activation.

## 169 **The mechanism of VLP-mediated inflammasome activation is related to lysosomal** 170 **damage**

171 We further investigated the mechanism of inflammasome activation by PyV-derived  
172 VLPs. It is likely that accumulation of phagocytosed VLPs in lysosomes can damage them  
173 and induce the release of cathepsins, in particular cathepsin B (CtsB) that is one of the  
174 activators of NLRP3 inflammasome. We observed a significant decrease of IL-1 $\beta$  secretion



175 after treatment of THP-1 cells with CtsB inhibitor Ca-074 Me (Fig 6A). However, CtsB did  
176 not reduce cell death (Fig 6B and C). The results were the same even at higher (10  $\mu$ M) Ca-  
177 074 Me concentration (Fig 6D and E). This suggests that VLPs may induce the cytotoxicity  
178 by different mechanism next to lysosomal damage-associated cell death.

179 Then, we treated THP-1 cells with the pan-cathepsins inhibitor K777. We observed a  
180 significant decrease in cell death (Fig 6F-H). Staining of cell nuclei with PI to count dead  
181 cells confirmed that K777 inhibitor protected from cell death. Next, we measured IL-1 $\beta$   
182 release and found that K777 significantly suppressed IL-1 $\beta$  secretion, however, not to control  
183 baseline. This indicates that K777 is a partial inhibitor of inflammasome activation induced  
184 by PyV-derived VLPs.

### 185 **PyV-derived VLPs induced inflammasome activation via K<sup>+</sup> efflux**

186 Lysosomal damage can induce further processes which consolidate inflammasome  
187 activation by VLPs as it was shown with inhaled particles, like silica and polystyrene  
188 nanoparticles (Rabolli *et al.*, 2016a). The VLPs might also trigger different cell activation  
189 pathways leading to inflammasome activation. To prove this assumption, we investigated an  
190 alternative inflammasome activation pathway using K<sup>+</sup> efflux inhibitor, glybenclamide. This  
191 inhibitor significantly blocked cell death according to LDH release data (Fig 7A). We also  
192 observed a significant decrease in IL-1 $\beta$  release after glybenclamide pre-treatment (Fig 7B).

193 Taken together, these results reveal the complexity of inflammatory responses leading  
194 to inflammasome activation induced by PyV-derived VLPs in THP-1 macrophages. It is  
195 likely that several different mechanisms are involved in this process.

### 196 **Inflammasome activation by PyV-derived VLPs was confirmed in primary human 197 macrophages**

198 As cell lines may misrepresent real cell activation pattern, we used primary human  
199 macrophages derived from monocytes of peripheral blood mononuclear cells to confirm cell  
200 activation profile observed in THP-1 cells treated with PyV-derived VLPs. Activation of  
201 primary human macrophages with VLPs revealed a similar cell activation pattern to that  
202 observed in THP-1 macrophages – a significant increase in activated caspase-1 (Fig 8A and  
203 B), cell death (Fig 8C), and TNF- $\alpha$  and IL-1 $\beta$  release (Fig 8D and E). Moreover, NLRP3  
204 inflammasome inhibitor MCC950 significantly reduced primary human macrophage  
205 activation and rescued from cell death (Fig 8A-C). As in experiments with THP-1  
206 macrophages, not all primary human macrophages were activated by the VLPs and the  
207 percentage of dead cells did not exceed 20% (Figs 3E and 8C). According to FLICA assay  
208 indicating caspase-1 activation (Fig 8A and B), only a part of primary human macrophages  
209 was activated by VLPs. According to PI staining, primary macrophages having activated  
210 caspase-1 also were dead (Fig 8A) proving the pyroptotic cell death. These experiments  
211 indicate a similar pattern of PyV VLP-induced inflammation followed by inflammasome  
212 activation both in THP-1 cell line and in primary human macrophages.

213 We found that in some THP-1 cells the inflammasome is activated and in some is not  
214 based on data obtained from caspase-1 and ASC speck formation assays. To identify  
215 differences between these cells, we performed single-cell RNA sequencing (ScRNAseq)  
216 analysis. This analysis was also used to reveal whether KIPyV and MCPyV VLPs induce

217 different cell activation states since we observed different cell activation levels according to  
218 inflammatory cytokine production.

### 219 **ScRNAseq reveals an overall conserved gene expression response to PyV-derived VLPs**

220 *In vitro* differentiated THP-1 macrophages were subjected to stimulation by VLPs of  
221 KIPyV or MCPyV (and unstimulated control – PBS) for 15 h followed by single-cell  
222 RNAseq (Fig 9A). Upon removing transcriptomes with <900 total counts, 32,415 cells were  
223 retained, with >10,000 cells per condition. The mitochondrial gene count filter,  
224 conventionally used as a signature of dead cells (Luecken & Theis, 2019), was omitted to  
225 enable a comparison of the viability observed from scRNAseq data.

226 Uniform Manifold Approximation and Projection (UMAP) visualization of  
227 scRNAseq data revealed an overall similar population structure between KIPyV and MCPyV  
228 VLP treated cells, and an apparent difference compared to the unstimulated control (Fig 9B).  
229 A bulk-like differential gene expression (DGE) analysis identified 43 upregulated and 12  
230 downregulated genes in KIPyV VLP case vs the control (Fig 9C and Table EV1). The  
231 equivalent analysis of MCPyV VLP case vs control revealed 39 and 27 genes, respectively  
232 By contrast, a total of 5 differentially-expressed genes (DEGs) were identified when  
233 comparing MCPyV vs KIPyV VLP-treated cells. Most of the enriched genes compared to the  
234 control were the same regardless of the VLPs used for stimulation, and the 5 most-enriched  
235 terms in a GO gene set enrichment analysis of these common genes were associated with  
236 immune cell activation processes (migration, chemotaxis, response to TNF and IL-1) (Fig 9D  
237 and EV9, Table EV2).

### 238 **ScRNAseq reveals multiple subpopulations of THP-1 macrophages and changes in their 239 abundance upon VLP stimulation**

240 The UMAP visualization of scRNAseq data revealed a continuous structure with no  
241 clear boundaries between gene expression states. Upon interactive exploration (Weinreb *et al*,  
242 2018) of gene expression patterns and Leiden clustering results at different resolution (i.e.  
243 different number of clusters), we chose to report on 9 populations (Fig 10A) of variable  
244 abundance across the 3 conditions (Fig 10B and C). For each cell population, we identified  
245 20 most enriched genes (FDR<0.05, Mann-Whitney U test). Hierarchical clustering of the  
246 expression of these genes across all 9 populations revealed both distinct and overlapping gene  
247 expression signatures and the transcriptional relationship between populations (Fig 10D and  
248 E). The major split of the population dendrogram (Fig 10D) separates activated states (AI,  
249 AII, HA, IR) enriched after VLP stimulation (Fig 10F) from SS, RS, MA, and PA. The  
250 population of dead cells cluster with the latter but form a distant branch. Consistently with  
251 cell viability assays (Fig 3D and E), the fraction of dead cells, characterized by a high  
252 expression of mitochondrial genes (Fig 10E and Fig EV10A, Table EV3), increases with  
253 VLP stimulation from 2% to 5-6% (Fig 10C).

254 None of the states was completely quiescent, i.e., with all cells in the G0 stage, as  
255 suggested by a classification into cell cycle stages based on gene expression, although  
256 different populations showed a variable fraction of cells in G1/M/G2/S stages (Fig 10G).

257 The cell cluster most uniformly represented across the three conditions (PBS, KIPyV  
258 and MCPyV VLPs) was called steady state (SS) (Figs 10A and 10F). Among its enriched  
259 genes are *CD52*, *LMO4*, *CHI3L1*, *COX5B* (Figs. 10E and EV10Bb, Table EV3). The function  
260 of most of proteins encoded by these genes is unclear. CD52 is a glycoprotein of an unknown  
261 function. A recent study showed the ability of soluble CD52 to suppress inflammatory  
262 cytokine production by inhibiting TLR-induced NF- $\kappa$ B activation in macrophages,  
263 monocytes, and dendritic cells (Rashidi *et al*, 2018). *COX5B* encodes 5B subunit of  
264 Cytochrome C Oxidase, an essential mitochondrial respiratory chain enzyme (Galati *et al*,

265 2009). An increased expression of *COX5B* may be related to an increased cellular respiration.  
266 *LMO4*-encoded protein may play a role as an oncogene targeting TGF- $\beta$  signalling pathway  
267 (Lu *et al*, 2006). Overall, the phenotype of SS population is unclear as the functions of most  
268 enriched genes in macrophages are unknown. In addition, GO enrichment analysis did not  
269 show any relation to known GO terms (Fig 10E). Therefore, this population could be  
270 described as a new possible phenotype of THP-1 cell line.

271 One cell cluster, the relative abundance of which changed upon cell activation, was  
272 called resting state (RS) (Fig 10A). This cell population did not express inflammatory  
273 molecules and the enriched genes were related to usual cellular processes. Even so, this  
274 cluster distinguished oneself by high enrichment of *ARHGAP18*, *TMEM158*, *TGM2*, *OXR*,  
275 and *FNI*, which have vital or still unknown functions (Figs 10E and EV10C, Table EV3).  
276 *ARHGAP18* encodes Rho GTPase Activating Protein 18, which is essential for actin  
277 remodelling, thus, it is important for cell migration and controls cell shape (Maeda *et al*,  
278 2011). *TMEM158* encodes Transmembrane Protein 158 which biological function is unclear,  
279 although its involvement in activation of Ras pathway was shown. It was reported that  
280 *TMEM158* enhanced proliferation and migration of cancer cells (Cheng *et al*, 2015; Liu *et al*,  
281 2020). For example, another transmembrane protein *TMEM119* was identified as a marker of  
282 brain-resident macrophage, called microglia, marker, representing microglia with  
283 homeostatic properties (Butovsky *et al*, 2014; Satoh *et al*, 2016). Noticeably, *TMEM158*  
284 expression decreased after activation with VLPs addressing its presence in ramified  
285 macrophages (Fig EV10I). *TGM2* encodes Transglutaminase 2 implicated in cell death  
286 pathways (Mastroberardino *et al*, 2002). *OXR1* encodes Oxidation Resistance Protein 1,  
287 which is involved in protection from oxidative stress and is important for lysosomal function  
288 (Volkert *et al*, 2000; Wang *et al*, 2019). *FNI* encodes fibronectin 1 known for its function in  
289 cell adhesion, cell motility, and maintenance of cell shape (Hynes, 1986; Kornblihtt &  
290 Gutman, 1988). Therefore, expression of these genes indicates restful cells.

291 Another cell cluster that changed upon cell activation was called metabolically active  
292 (MA) (Fig 10A). It had a higher expression of mitochondrial and ribosomal genes, for  
293 example, *MT-CO3*, *MT-CYB*, *RPL37A*, and *RPS23* (Figs. 10E and EV10d). The MA cluster  
294 did not show expression of genes related to inflammatory cell activation, but the observed  
295 gene expression profile indicates increased cellular respiration that is related to high cell  
296 metabolic activity (Osellame *et al*, 2012). Enrichment in ribosomal genes characterized  
297 protein production indicating metabolic cell activity.

298 In the control condition (PBS) we found a cluster in which the cells seemed to be  
299 activated *a priori*. It was named prone to activation (PA) (Fig 10A). Higher expression of  
300 *SPP1*, *CTSC*, *TREM2*, *S100A4*, and *IL1B* was detected in some cells of this cluster (Figs 10E,  
301 EV10E and EV10F, Table EV3). It is possible that these cells showed a delayed response to  
302 phorbol 12-myristate 13-acetate (PMA) used for THP-1 differentiation. This cell cluster  
303 disappeared after treatment with VLPs. *CTSC* encodes lysosomal protease Cathepsin C. As  
304 other cathepsins, *CTSC* is important for cargo degradation (Kominami *et al*, 1992). *CTSC*  
305 was also shown to be necessary for activating serine proteases since its absence altered  
306 extracellular IL-1 $\beta$  activation mediated by serine proteases (Rabolli *et al*, 2016b). In addition,  
307 upregulation of *CTSC* mediates macrophage polarization to inflammatory phenotype (Alam  
308 *et al*, 2019; Liu *et al*, 2019). *S100A4* encodes calcium-binding protein *S100A4* involved in  
309 inflammatory reactions (Hansen *et al*, 2015; Helfman *et al*, 2005). *SPP1* encodes Secreted  
310 Phosphoprotein 1 that is chemotactic, induces IFN- $\gamma$  and IL-12 production, and promotes cell  
311 survival (Wang & Denhardt, 2008). *TREM2* encodes Triggering Receptor Expressed on  
312 Myeloid Cells 2 that triggers secretion of inflammatory molecules (Bouchon *et al*, 2001;  
313 Kobayashi *et al*, 2016), although, anti-inflammatory effect of *TREM2* was demonstrated in

314 macrophages lacking TREM2 as toll-like receptor stimulation induced higher pro-  
315 inflammatory cytokine secretion (Turnbull *et al*, 2006). Soluble TREM2 was identified as an  
316 activator of inflammatory response (Zhong *et al*, 2017). It enhances phagocytosis as its loss  
317 impairs cellular uptake of various substrates, such as cellular debris (Takahashi *et al*, 2005),  
318 bacteria (N'Diaye *et al*, 2009) or amyloid-beta aggregates (Jiang *et al*, 2014). Overall, PA  
319 cells are differently activated than other THP-1 cell populations (AI, AII, HA, IF) and they  
320 distinguish themselves as having inflammation-related and phagocytic cell properties.

321 The cluster of cells formed upon VLP stimulation was defined as a high activation  
322 (HA) state (Fig 10A). This cluster was more abundant in MCPyV VLP-treated cells than in  
323 KIPyV VLP-treated cells (Fig 10F). This cell population was characterized with the highest  
324 expression of *IL1B* and chemokine genes, such as *CXCL1*, *CXCL3*, *CXCL8*, *CCL3*, *CCL20*,  
325 *CCL4L2*, and *CSTB* (Figs. 10E and EV10F, Table EV3). It is known that *IL1B* is expressed  
326 at extremely high levels in myeloid-derived cells in response to microbial invasion and tissue  
327 injury (Adamik *et al*, 2013). The product of *IL1B* is pro-inflammatory cytokine IL-1 $\beta$ , a key  
328 mediator of inflammation and one of the main indicators of NLRP3 inflammasome assembly  
329 (Tominaga *et al*, 2000). IL-1 $\beta$  induces the production of chemokines and proteases, such as  
330 matrix metalloproteinase, to attract other immune cells to the infection site. Furthermore,  
331 secretion of chemokines is reduced in NLRP3-deficient mice demonstrating the importance  
332 of inflammasome activation in chemotaxis (Shimizu *et al*, 2019). IL-1 $\beta$  is a product of  
333 inflammasome activation, thus, factors stimulating the inflammasome also recruit immune  
334 cells. *CXCL1*, *CXCL3*, and *CXCL8* encode members of the CXC subfamily of chemokines,  
335 the chemoattractants for neutrophils (Raman *et al*, 2011). *CXCL8* also known as IL-8 has no  
336 homologs in rats or mice and is a significant component of inflammation-mediated processes  
337 as it attracts neutrophils, basophils, and T-cells to the site of infection and promotes  
338 endothelial cell migration, invasion, and proliferation (Schutyser *et al*, 2002). HA state is also  
339 rich in genes of other chemoattractants *CCL3* and *CCL20*. *CCL3*, also known as macrophage  
340 inflammatory protein 1 alpha, is induced by NF- $\kappa$ B signalling pathway and triggers  
341 inflammatory reactions (Cook, 1996). *CCL20* acts as a ligand for C-C chemokine receptor  
342 CCR6 that induces a strong chemotactic response and plays an important role at skin and  
343 mucosal surfaces under homeostatic and inflammatory conditions (Ito *et al*, 2011). HA  
344 cluster was also highly enriched in *CSTB* which encodes cystatin B, a cysteine protease  
345 inhibitor known to interact with cathepsin B (Pavlova *et al*, 2000) and considered to protect  
346 from cathepsin leakage from damaged lysosomes (Mrschtik & Ryan, 2015). *CSTB* expression  
347 reveals possible lysosomal damage induced by VLPs. Overall, highly enriched genes of HA  
348 state showed a strong inflammatory response in VLP-treated macrophages.

349 Other cell clusters formed upon cell activation were named the Activation I (AI) and  
350 Activation II (AII) states (Fig 10A). AI cluster was more characteristic for KIPyV than  
351 MCPyV VLP-treated cells and AII state *vice versa* (Fig 10F). Both clusters had enriched  
352 inflammation-related genes similarly to HA state but at lower levels (Fig 10E). AI state was  
353 characterized by high *IL1B*, *CXCL8*, *CCL3L1*, and *CCL3* expression (Figs. 10E and EV10G,  
354 Table EV3). AII had relatively low expression of *IL1B* but the enrichment in *CXCL8*,  
355 *CCL3L1* and *CCL3* was similar to AI. In general, the same genes were enriched in HA, AI,  
356 and AII states, although the expression levels were different. Furthermore, HA and AII were  
357 different from AI state as HA and AII had enrichment in *STC1*, *MMP8*, *ATP2B1*, *FTH1*, and  
358 *SNX9* genes. Interestingly, enrichment in some of these genes, like *ATP2B1* and *SNX9*, was  
359 similar to RS cluster. *STC1* is known to encode Stanniocalcin 1, a secreted glycoprotein  
360 involved in inflammation and carcinogenesis (Chang *et al*, 2003) that possibly serves as a



361 negative mediator of inflammation (Leung & Wong, 2021). Interestingly, HA state, which  
362 was highly enriched in pro-inflammatory cytokines, also expressed high levels of *STC1*.  
363 MMP8 is a Matrix Metalloproteinase-8 that cleaves collagen, some cell adhesion proteins,  
364 growth factors and chemokines (Van Lint & Libert, 2006), and promotes polarization of  
365 macrophages into alternatively activated (M2) macrophages (Wen *et al*, 2015). Therefore,  
366 AII and HA states describe a group of activated macrophages expressing inflammation-  
367 related genes and a couple of inflammation suppressors. *SNX9* encodes Sorting Nexin 9  
368 involved in intracellular trafficking (Kurten *et al*, 1996), and regulate clathrin-mediated  
369 endocytosis (Carlton *et al*, 2005). It also plays a role in inflammatory reactions (Ish-Shalom  
370 *et al*, 2016) and regulation of micropinocytosis – endocytosis pathway (Wang *et al*, 2010). In  
371 innate immune cells this endocytosis pathway may function for the delivery of antigens to  
372 their respective intracellular pattern recognition receptors (Canton, 2018). Since endocytosis  
373 pathway of polyomavirus VLPs is unclear, *SNX9* may contribute to intracellular recognition  
374 of VLPs. *ATP2B1* encodes Plasma Membrane Calcium ATPase 1 (PMCA1) important in  
375 maintaining cytosolic  $Ca^{2+}$  for physiological cell functions (Brini & Carafoli, 2011).  $Ca^{2+}$   
376 mobilization is critical for NLRP3 inflammasome activation (Murakami *et al*, 2012). Thus,  
377 calcium pumps could be implicated in inflammasome signalling detected after VLP  
378 treatment. *FTH1* encodes the heavy subunit of ferritin which is essential to store iron inside  
379 cells (Gozzelino & Soares, 2014). Macrophages are central players in iron metabolism as  
380 they recycle senescent erythrocytes and modulate iron availability as part of host protective  
381 mechanisms (Soares & Hamza, 2016). *FTH1* is crucial in protection against iron-induced  
382 oxidative stress and cell death as it is involved in decreasing peroxide formation from iron  
383 (Mesquita *et al*, 2020). In summary, HA and AII clusters next to inflammation-related genes  
384 also expressed higher levels of genes encoding ion channels and proteins involved in  
385 endocytosis contrary to AI state.

### 386 **While most population and gene expression changes are conserved, interferon-response** 387 **population is highly enriched upon activation with MCPyV-derived VLPs**

388 Analysis of the previously identified (Fig 9C and D) global gene expression changes  
389 at the individual population level revealed very similar gene expression patterns between  
390 KIPyV and MCPyV VLP-treated THP-1 cells (Figs 11A-C and EV11A). A population  
391 abundance fold-change analysis emphasized the overall similar phenotype of the two VLP-  
392 treatment conditions (Fig 11D), while abundance differences in abundance relatively to  
393 control exceeded 30x (Fig 11E, F). However, a notable exception was the interferon-response  
394 population (IR), highly enriched after MCPyV VLP stimulation compared to KIPyV VLP  
395 (Fig 11D), and characterized by the expression of *CXCL10*, *ISG15*, *IFITM3*, *IFIT1-3*, *IFI6*,  
396 *CXCL11* and other genes (Figs 10E and EV10H, Table EV3), known to be involved in  
397 inhibition of viral invasion. Interestingly, we found an increase in interferon-inducible gene  
398 expression only after treatment with MCPyV VLPs. We assume that macrophage  
399 engagement with viral antigens itself mediates anti-viral activity in macrophages without  
400 external stimulation, such as lipopolysaccharide. In addition, the expression of IR-specific  
401 genes was essentially absent in control cells and after treatment with KIPyV VLPs (Fig  
402 EV10B). This suggests differences in pathogen-associated molecular patterns derived from  
403 human PyVs.

404 In detail, most of IR cluster genes are induced by interferon (IFN) and related to cell  
405 response during viral infection. *IFITMs* encode Interferon-Induced Transmembrane Proteins,  
406 that limit viral infection via entry pathway (Zhao *et al*, 2018). In interferon-stimulated cells  
407 *IFITM3* is localized on endocytic vesicles which fuse with incoming virus particles and



408 enhance their trafficking to lysosomes (Spence *et al*, 2019). Recent study revealed that  
409 IFITM3 is able to inhibit SARS-CoV-2 infection *in vitro* (Shi *et al*, 2021). *IFITs* encode  
410 Interferon-Induced Proteins with Tetratricopeptide repeats that block viral infection by  
411 interacting with factors responsible for virus replication (Zhou *et al*, 2013). *IFI6* encodes  
412 Interferon- $\alpha$  Inducible Protein 6. The exact function of this protein is still unclear. The family  
413 of *IFI6* genes encodes mitochondrial proteins implicated in inhibition of apoptosis (Cheriyath  
414 *et al*, 2011). *IFI6* was also shown to inhibit DNA replication in hepatitis B virus (Sajid *et al*,  
415 2021). *ISG15* (Interferon Stimulated Gene 15) encodes ubiquitin-like protein that is induced  
416 by type I interferons and involved in various processes related to host antiviral response,  
417 acting as extracellular and intracellular signalling protein (Perng & Lenschow, 2018). Its  
418 upregulation was detected in macrophages after infection by vaccinia and SARS-CoV-2  
419 viruses (Sanyal, 2020; Yángüez *et al*, 2013). This protein is likely to be an important factor  
420 implicated in cytokine storms triggered by SARS-CoV-2. *ISG15* deletion in bone marrow-  
421 derived macrophages induced mitochondrial dysfunction and altered nitric oxide production  
422 exposing its importance in regulating mitochondrial function (Baldanta *et al*, 2017). Other  
423 genes rich in IR state encode *CXCL10* and *CXCL11*, but the latter expression was detected  
424 only in several cells. *CXCL10* is known as early interferon response gene encoding *CXCL10*  
425 with inflammation-related pleiotropic effects (Booth *et al*, 2002). *CXCL11* participates in  
426 inflammatory reactions and acts as a chemoattractant of activated T cells (Gasperini *et al*,  
427 1999). *CXCL10* and *CXCL11* are thought to be key mediators of the cytokine storm in  
428 immune response to SARS-CoV-2 infection (Callahan *et al*, 2021). Overall, high expression  
429 of IR-specific genes indicates cellular response to interferon induced in THP-1 cells by VLP  
430 treatment.

## 431 **Discussion**

432 In our study we focused on the inflammatory response of human macrophages treated  
433 with viral oligomeric proteins. Cellular response to nanoparticles has been explored  
434 previously covering different mechanisms. It was demonstrated that polymeric nanoparticles  
435 induced NLRP3 inflammasome activation dependent on cathepsin B in macrophages (Vaine  
436 *et al*, 2013). Another study showed that oligomeric proteins, A $\beta$  fibrils, cause lysosomal  
437 damage and induce inflammasome activation (Halle *et al*, 2008). Our previous study showed  
438 that A $\beta$  oligomers and protofibrils activated the NLRP3 inflammasome in microglia cells  
439 (Luciunaite *et al.*). In addition, tau oligomers and  $\alpha$ -synuclein fibrils were shown to trigger an  
440 inflammatory response in microglia (Ising *et al.*, 2019; Pike *et al*, 2021). The latter reports  
441 demonstrated inflammasome activation in macrophages by endogenous pathogenic protein  
442 oligomers. However, there are limited data on molecular mechanisms how oligomeric  
443 proteins activate NLRP3 inflammasome. To address this question, we investigated the ability  
444 of exogenous oligomeric proteins of viral origin to induce inflammatory responses in human  
445 macrophages.

446 In our study, we have used different viral oligomeric proteins – filamentous NLPs of  
447 measles and mumps viruses and spherical VLPs of KIPyV and MCPyV. We did not observe  
448 any inflammatory response to NLPs, although, NLRP3 inflammasome activation was  
449 demonstrated to be induced by N protein of SARS-CoV-2 (Pan *et al*, 2021). Interestingly, N  
450 protein of SARS-CoV-2 inhibits the cleavage of gasdermine D, which forms pores in the  
451 membrane, reducing IL-1 $\beta$  secretion and pyroptosis (Ma *et al*, 2021). In our study, only PyV-

452 derived VLPs induced inflammatory response of human macrophages followed by NLRP3  
453 inflammasome activation that was demonstrated by TNF- $\alpha$  and IL-1 $\beta$  release, cytotoxicity  
454 induction, caspase-1 activation and ASC speck formation. Specific NLRP3 inflammasome  
455 inhibitor MCC950 blocked the detected activation signal proving PyV-derived VLPs as a  
456 trigger of NLRP3 inflammasome. In addition, VLPs induced secretion of other inflammatory  
457 cytokines TNF- $\alpha$  and IL-6 suggesting the engagement of NF- $\kappa$ B signalling pathway in the  
458 activated macrophages.

459 NLRP3 inflammasome can be activated by different mechanisms, such as changes in  
460 intracellular ion concentration, mitochondrial or lysosomal damage followed by cathepsins  
461 release (Kelley *et al*, 2019). First, we studied inflammasome activation mechanism related to  
462 lysosomal damage since PyV-derived VLPs are phagocytosed particles. The VLP-induced  
463 inflammasome activation signal was significantly reduced by cathepsin B and pan-cathepsin  
464 inhibitors. However, the inhibitory effect was not complete compared to control. Cathepsin B  
465 inhibitor reduced only IL-1 $\beta$  release and had no effect on cell death. In the case of MCPyV-  
466 derived VLPs, IL-1 $\beta$  secretion and cell death did not drop to control baseline even using pan-  
467 cathepsin inhibitor. In the case of KIPyV-derived VLPs, pan-cathepsin inhibitor completely  
468 reduced cell death, contrary to IL-1 $\beta$  release. This suggests that VLP size and possibly other  
469 structural features of VLPs may define cell activation profile. Viral capsids of KIPyV and  
470 MCPyV are structurally different, thus, they may interact with different cellular receptors. In  
471 addition, the hemagglutination ability was demonstrated only for MCPyV indicating different  
472 glycoproteins on KIPyV and MCPyV capsid surface (Neu *et al*, 2012; Neu *et al*, 2011).

473 There are controversial data on particle-induced inflammasome activation. Some of  
474 them show that nanoparticles induce NLRP3 inflammasome activation via phagosomal  
475 destabilisation (Hornung *et al*, 2008). Other studies reveal that different nanoparticles induce  
476 different mechanisms depending on the composition and structure of the particles (Rashidi *et al*,  
477 2020). For example, cholesterol crystals activate NLRP3 inflammasome, however,  
478 inhibitors of cathepsins reduce only IL-1 $\beta$  release and do not change the level of cell death. It  
479 is assumed that inflammasome can be activated by further inflammation mediators, such as  
480 reactive oxygen species and K<sup>+</sup> ion efflux. On the other hand, cell death due to cell  
481 membrane damage could be an irreversible process. In addition, the role of cathepsins in  
482 inflammasome activation is not fully understood. For example, it was recently shown that  
483 cathepsins can induce activation of pore-forming protein gasdermin D (Selkrig *et al*, 2020).  
484 We assumed that PyV-derived VLPs induced inflammasome activation via lysosomal  
485 damage and investigated the underlying mechanisms related to VLP-induced cell death, in  
486 particular the mechanism of K<sup>+</sup> ion efflux. We demonstrated that a specific inhibitor of K<sup>+</sup>  
487 ion efflux significantly reduced cell death and IL-1 $\beta$  release suggesting the complexity of  
488 macrophage activation by PyV-derived VLPs. In addition, studies on the possible outcome of  
489 lysosomal leakage indicate that effector molecules such as cathepsins released after the  
490 permeabilisation of lysosomal membrane may activate the inflammasome by several  
491 mechanisms, including K<sup>+</sup> ion efflux and intracellular Ca<sup>2+</sup> initiated signalling events (Stahl-  
492 Meyer *et al*, 2021). Cathepsins can also induce synthesis of IL-1 $\beta$  precursor leading to a  
493 higher release of inflammatory cytokines and involvement of cathepsins in NF- $\kappa$ B signalling  
494 (Orlowski *et al*, 2015). This demonstrates that inflammasome activation by phagocytosed  
495 particles is beyond the classical mechanism.

496 Finally, we proved the inflammatory response observed in human macrophage cell  
497 line THP-1 to PyV-derived VLPs using primary human macrophages. The same cellular  
498 events were identified both in THP-1 cell line and the primary human macrophages.  
499 Activated caspase-1 was detected in dead primary macrophages suggesting the pyroptotic cell  
500 death. As in THP-1 experiments, only a part of the primary macrophages was activated by the  
501 VLPs. To conclude, the inflammatory response of cells treated with PyV-derived VLPs  
502 demonstrates the capability of large-sized multimeric protein particles to induce a similar cell  
503 activation pattern both in macrophage cell line and primary human macrophages.

504 From *in vitro* studies it is well known that strong inducers of inflammation, such as  
505 lipopolysaccharides or nigericin, can induce high cell activation states. However, other  
506 cell activators usually mediate modest cellular response. For example, in previous research  
507 we showed lower inflammasome activation by A $\beta$  oligomers compared to classical NLRP3  
508 inflammasome inducer nigericin (Luciunaite *et al.*). However, when A $\beta$ -activated cells were  
509 observed microscopically it was clear that not all of them exhibited similar level of  
510 inflammasome activation. It raises a question on the activation state of separate cells. The  
511 presence of heterogeneous cell populations was demonstrated several times by other groups.  
512 For example, brain macrophages, microglia, are at different cell activation states depending  
513 on the distance from amyloid-beta (A $\beta$ ) plaque in the brain of Alzheimer's disease patients  
514 (Swanson *et al*, 2020). Microglia with different phagocytic capabilities were also identified in  
515 Alzheimer's disease-relevant mouse model. Interestingly, microglia non-containing A $\beta$  had  
516 more changes in expression of genes associated with accelerated ageing process than  
517 microglia with A $\beta$  content (Grubman *et al*, 2021). In addition, microglia are heterogeneous in  
518 healthy brain and cells enriched in inflammation-related genes are present throughout the  
519 lifespan and rises up in the aged brain (Hammond *et al*, 2019). ScRNAseq analysis of  
520 peripheral blood mononuclear cell culture revealed that monocytes respond differently to  
521 lipopolysaccharide (Lawlor *et al*, 2021). One cell population expressed pro-inflammatory  
522 alarmins and chemokines to attract immune cells while another was enriched in later  
523 inflammation-related and anti-inflammatory genes to either enhance or terminate  
524 inflammatory reaction. In our study, IL-1 $\beta$  and TNF- $\alpha$  release data showed overall cell  
525 activation by PyV-derived VLPs, however, caspase-1, ASC speck and cell viability assays  
526 allowed the identification of differently activated cells. Therefore, we performed a single-cell  
527 analysis to identify gene expression differences in cells which primarily were expected to be  
528 homogenous – THP-1 cell culture model.

529 ScRNAseq analysis showed highly divergent cell activation pattern after treatment  
530 with PyV-derived VLPs. Four activated THP-1 cell populations varying in expression of  
531 inflammation-related genes, among them IL1B and chemokine genes, were identified. IL-1  
532 family cytokines are known to induce the production of chemokines (Dinarello, 2018). The  
533 stress response and prolonged inflammation also lead to recruitment of immune cells (Carta  
534 *et al*, 2017). Therefore, increased chemokine expression in cells, enriched in IL-1 $\beta$  and other  
535 inflammation mediators, indicates a strong inflammatory response. After VLP treatment, one  
536 cell cluster was highly enriched in inflammation-related genes (HA state), including IL-1 $\beta$ .  
537 This population was also enriched in CSTB which encodes cystatin B, an inhibitor of  
538 cathepsin B. It possibly copes with cathepsins released after lysosomal leakage (Mrschik &  
539 Ryan, 2015). Therefore, CSTB expression verifies lysosomal damage induced by VLPs. This

540 cell cluster may represent a population of inflammasome-activated cells, which we revealed  
541 according to ASC speck formation, cell viability and caspase-1 assays.

542 Interestingly, two populations of activated cells, including the HA cell cluster, also  
543 expressed negative mediators of inflammation next to inflammation-related genes. This may  
544 indicate a prolonged cell activation state when self-protecting genes were switched on to  
545 avoid hyperinflammation. It is known that after inflammatory response follows the resolution  
546 phase when anti-inflammatory molecules are secreted (Schett & Neurath, 2018).

547 Comparing KIPyV and MCPyV VLP-induced cellular response, we found the  
548 expression of interferon response-related genes only after MCPyV VLP treatment. This  
549 extends known KIPyV and MCPyV differences. Among interferon-response genes were  
550 CXCL10 and IGS15, involved in host antiviral response and found to induce cytokine storm  
551 in SARS-CoV-2 infected patients (Callahan *et al.*, 2021; Sanyal, 2020). Interferon-induced  
552 proteins participate in inflammatory reactions and attract different cells of innate and  
553 adaptive immunity. Interferon-stimulated genes can be triggered not only by viral antigens  
554 directly but also by cellular stress response, thus, their encoded proteins may have a broader  
555 biological function (Fensterl & Sen, 2015).

556 Summarizing, single cell analysis revealed the presence of heterogeneous cell  
557 populations in the *in vitro* cell culture model, THP-1 macrophages, which might be expected  
558 to be a homogenous cell culture. Even more complex cell activation patterns might be  
559 predicted *in vivo*. Although the molecular mechanisms behind different cell activation states  
560 are unknown, our study shows that some cells respond to the activating agent by  
561 inflammatory reactions while other cells remain unaffected. Assuming the inflammasome  
562 activation by protein oligomers as a result of phagocytosis-related process, we suppose that  
563 some cells are capable to degrade their cargo and some not, which may lead to lysosomal  
564 disruption.

565 Inactivated viruses and recombinant viral proteins are broadly used for vaccination  
566 (Pollard & Bijker, 2020). However, the mechanisms of the immune response and especially  
567 activation of the innate immunity components induced by viral proteins are barely  
568 investigated. Therefore, the results of our study on PyV-derived VLPs as potent inducers of  
569 the inflammatory response in macrophages as compared to recombinant filamentous NLPs  
570 that are incapable to trigger the inflammation would broaden the understanding of the  
571 interaction of viral proteins with innate immune cells. Our study suggests that not all viral  
572 proteins can trigger the inflammatory response and their structural properties are one of the  
573 factors defining cell activation pathway.

## 574 **Materials and Methods**

### 575 **Materials**

576  
577 Dulbecco's modified Eagle's medium (DMEM; cat# 31966047), Roswell Park  
578 Memorial Institute 1640 medium (RPMI, cat#61870044), FluoroBrite DMEM  
579 (cat#A1896701), fetal bovine serum (FBS; cat# A3840402), penicillin/streptomycin (P/S;  
580 cat#15140122), Dulbecco's Phosphate Buffered Saline (PBS; cat#14190250), cell  
581 dissociation reagent TrypLE™ Express Enzyme (cat#12604021) were obtained from Gibco,  
582 ThermoFischer Scientific. Cell culture plates: T75 culture flasks Cell Culture Treated



583 EasYFlasks (cat#156499) were from Nunc, ThermoFischer Scientific; TPP Multi-well tissue  
584 culture plates (cat# 92012, cat#92024, cat#92048) were from TPP Techno Plastic Products  
585 AG; IbiTreat 96-well  $\mu$ -plates (cat#89626) were from Ibi. LPS (cat#tlrl-eb1ps), nigericin  
586 (cat#tlrnig), MCC950 (cat#inh-mcc), normocin (cat#ant-nr-1) and zeocin (cat#ant-zn-05)  
587 were from InvivoGen. K777 [K11777] (cat#AG-CR1-0158-M001) was from Adipogen. CA-  
588 074 Me (cat#A8239) was from ApexBio Technology. LDH cytotoxicity detection kit  
589 (cat#11644793001) was from Roche Diagnostics, Sigma-Aldrich by Merck. Phorbol 12-  
590 myristate 13-acetate (PMA, cat# P1585-1MG) was obtained from Sigma-Aldrich by Merck.  
591 Propidium Iodide (PI; cat#638), Hoechst33342 (Hoechst, cat#639) and FAM-FLICA®  
592 Caspase-1 Assay Kit (containing FLICA reagent FAM-YVAD-FMK – caspase-1 inhibitor  
593 probe; cat#98) were obtained from ImmunoChemistry Technologies. Dimethylsulfoxide  
594 (DMSO; cat#A3672) was from PanReac AppliChem and the ITW Reagents. Human IL-1  
595 beta Uncoated ELISA Kit (cat# 88-7261-77) and TNF alpha Uncoated ELISA Kit (cat#88-  
596 7346-86), IL-6 Uncoated ELISA Kit (cat#88-7066), IL-10 Uncoated ELISA Kit (cat#88-  
597 7106), Phosphate-Buffered Saline (10X) pH 7.4 (cat#AM9624), UltraPure DNase/RNase-  
598 Free Distilled Water (cat#10977035) were from Invitrogen, ThermoFischer Scientific.  
599 Tween-20 (cat# 9127.1) and sulphuric acid (H<sub>2</sub>SO<sub>4</sub>, cat#X873.1) were from CarlRoth.  
600 Chemiluminescent substrate – SuperSignal West Femto Maximum Sensitivity Substrate  
601 (cat#34094) was from ThermoFisher Scientific. NextSeq 500/550 High Output Kit v2.5  
602 (cat#20024906) was obtained from Illumina.

### 603 **Cell lines**

604 Human cell line THP-1 was kindly provided by prof. Linas Mažutis (Vilnius  
605 University, Vilnius, Lithuania). Cells were propagated in RPMI 1640 + 10% FBS + 100  
606 U/mL of P/S and were split twice a week by ratio 1:5 to 1:10.

607 Human cell line THP-1 monocytes – ASC speck reporter cells were purchased from  
608 Invivogen (#thp-ascgfp, Invivogen, France) and called THP-1-ASC-GFP. These cells express  
609 ASC protein fused to GFP. Cells were propagated in RPMI 1640 + 10% FBS + 100 U/mL of  
610 P/S + 100  $\mu$ g/ml of zeocin + 100  $\mu$ g/ml normocin and were split twice a week by ratio 1:5 to  
611 1:10. During cell differentiation to macrophages and treatment zeocin and normocin were not  
612 used.

### 613 **Human macrophage cell culture**

614 Human macrophage cell cultures were prepared by differentiation of THP-1 cells  
615 (Chanput *et al*, 2014). The cells were seeded in the 24 well plate at a density of  
616  $0.125 \times 10^6$ /well using RPMI 1640 medium supplemented with 10% FBS and 1% P/S and  
617 differentiated to macrophages using 100 ng/mL of PMA. After 48 h of differentiation the  
618 medium was replaced with the fresh medium without PMA and cells were left to rest for  
619 another 24 h. After the rest period the cells are differentiated into macrophages and were used  
620 in experiments with viral proteins. These macrophage-like cells were used in the study and  
621 called THP-1 macrophages.

622 THP-1 macrophages were washed once with serum-free RPMI and treated with viral  
623 proteins for 24 h. Viral proteins were prepared in PBS, so, control when PBS was added  
624 instead of viral proteins was used. As a positive control, the inflammasome inducer nigericin  
625 was used at 10  $\mu$ M concentration. MCC950, which selectively inhibits the NLRP3  
626 inflammasome, was used at 1  $\mu$ M concentration and added 30 min before the treatment.  
627 Inhibitors of cathepsins were used with the following concentrations: CA-074 Me at 2  $\mu$ M  
628 and 10  $\mu$ M, K777 at 15  $\mu$ M, and added 30 min before the treatment. Another inhibitor,



629 glybenclamide, which blocks K<sup>+</sup> efflux, was used at 50 µM concentration, 30 min before the  
630 treatment. After incubation, cell culture supernatants were collected and stored at -20 °C for  
631 further cytokine analysis. Supernatants for LDH assay were used instantly.

632 Primary human macrophages were purchased from Lonza (#4W-700). Human  
633 macrophages were derived from CD14<sup>+</sup> human monocytes of one donor. Cryopreserved cells  
634 were thawed and cultured for two days in RPMI 1640 medium supplemented with 10% FBS  
635 and 1% P/S before treatment. The cells were treated as THP-1 macrophages in serum-free  
636 RPMI. Cells for FLICA assay were plated in Ibidi 96-well µ-plate and for ELISA in TPP 24-  
637 well plate.

## 638 **Viral proteins**

639 Macrophages were activated with recombinant viral proteins (20 µg/ml) representing  
640 various oligomeric shapes and forms. KI polyomavirus recombinant major capsid protein  
641 VP1 (KIPyV VP1, 41.6 kDa) forms spherical oligomers – VLPs – containing up to 360  
642 monomers as described previously (Norkiene *et al.*, 2015a). MC polyomavirus recombinant  
643 major capsid protein VP1 (MCPyV VP1, 46.6 kDa) forms spherical oligomers – VLPs,  
644 containing up to 360 monomers as described previously (Norkiene *et al.*, 2015a). Measles  
645 virus recombinant nucleocapsid protein (MeV N, 58.0 kDa) forms filamentous structures as  
646 described previously (Samuel *et al.*, 2003; Zvirbliene *et al.*, 2007). Mumps virus recombinant  
647 nucleocapsid protein (MuV N, 66 kDa) also forms filamentous structures as described  
648 previously (Samuel *et al.*, 2002a). All viral proteins were expressed in yeast expression  
649 system and purified by CsCl density gradient centrifugation (Norkiene *et al.*, 2015a; Samuel  
650 *et al.*, 2002a; Samuel *et al.*, 2003; Slibinskas *et al.*, 2004).

## 651 **VLP production, purification and analysis**

652 Purification of VLPs of recombinant PyV VP1 proteins and electron microscopy were  
653 carried out as described previously (Norkiene *et al.*, 2015b). Briefly, *S.cerevisiae* yeast  
654 biomass after the induction of recombinant proteins synthesis, were mechanically  
655 homogenized in DB450 buffer (450 mM NaCl, 1 mM CaCl<sub>2</sub>, 0.25 M L-Arginine and 0.001%  
656 Triton x-100 in 10 mM Tris/HCl-buffer, pH 7.2) with 2 mM PMSF and EDTA-free  
657 Complete Protease Inhibitors Cocktail tablets (Roche Diagnostics, Mannheim, Germany),  
658 and its supernatant was transferred onto 30-60% sucrose gradient. After overnight  
659 centrifugation (at 4 °C) at 100,000×g (Beckman Coulter Optima L-90 ultracentrifuge)  
660 collected 2 mL fractions were analysed by SDS-PAGE. The mixture of fractions containing  
661 PyV VP1 proteins diluted in DB150 buffer (150 mM NaCl, 1 mM CaCl<sub>2</sub>, 0.25 M L-Arginine  
662 and 0.001% Triton x-100 in 10 mM Tris/HCl-buffer, pH 7.2) and VLPs were concentrated  
663 by ultracentrifugation at 100,000×g for 4 h (at 4 °C). Thereafter, pellets containing VP1 were  
664 subjected to ultracentrifugation overnight on CsCl gradient (1.23-1.46 g/mL density) at 4 °C.  
665 One millilitre fractions of formed gradient were collected and analysed by SDS-PAGE.  
666 Positive fractions were pooled, diluted in DB150 buffer and concentrated as described above.  
667 The isolated VLPs were dissolved in PBS, dialysed and stored in PBS with 50% glycerol.  
668 The VLP formation was verified by examination of the purified proteins using Morgagni-268  
669 electron microscope (FEI, Inc., Hillsboro, OR, USA). The protein samples were placed on  
670 400-mesh carbon-coated palladium grids (Agar Scientific, Stansded, UK) and stained with  
671 2% aqueous uranyl acetate.

## 672 **Cell cytotoxicity assays**

673 Cell cytotoxicity was measured using lactate dehydrogenase (LDH) release assay  
674 (LDH cytotoxicity detection Kit). A quantity of 50  $\mu$ L of cell supernatants was used to  
675 perform the cytotoxicity assay according to the manufacturer's protocol. Briefly, 50  $\mu$ L of  
676 supernatant was mixed with freshly prepared LDH reagent and incubated at 37 °C. After 30  
677 min absorbance was measured at 490 nm using Multiskan GO microplate spectrophotometer  
678 (Thermo Fisher Scientific Oy, Finland).

679 To determine cell viability PI/Hoechst nuclear staining was also used. Nuclei were  
680 stained with 1.25  $\mu$ g/ml PI and 1  $\mu$ g/ml Hoechst33342 in cell culture medium for 30 min. The  
681 cells were washed with PBS. The fluorescent signal was measured by taking photos  
682 automatically with fluorescence microscope EVOS FL Auto. Images were taken using a 20 $\times$   
683 objective. Viability was quantified according to a ratio of PI (dead cells) and Hoechst (all  
684 cells), expressed in percentages.

### 685 **Quantitation of cytokines in cell culture supernatants**

686 ELISA kits for the measurement of human cytokine – IL-6, IL-10, IL-1 $\beta$  and TNF- $\alpha$  –  
687 levels in cell culture supernatants were used (#88-7066, #88-7106, #88-7261, #88-7346,  
688 Thermo Fisher Scientific, USA). ELISA kits are based on the sandwich immunoassay  
689 technique. Supernatants were used diluted up to 1:600. All procedures were performed  
690 according to manufacturers' protocols. In the last step 3,3',5,5'-tetramethylbenzidine (TMB)  
691 substrate solution was added to each well. The plates were monitored for 15 min for colour  
692 development, the reaction in wells was stopped with 3.6% H<sub>2</sub>SO<sub>4</sub> solution and the wells were  
693 read at 450 nm with reference wavelength at 620 nm using Multiskan GO microplate  
694 spectrophotometer. A standard curve was generated from cytokine standard and the cytokine  
695 concentration in the samples was calculated.

### 696 **Detection of ASC speck formation in THP-1 macrophages**

697 THP-1 monocytes expressing ASC fused with green fluorescent protein (GFP) was  
698 used for ASC speck formation. The cells were cultivated in RPMI 1640 medium  
699 supplemented with 10% FBS, 1% P/S, 100  $\mu$ g/mL normocin and 100  $\mu$ g/mL selective  
700 antibiotic zeocin. THP-1-ASC-GFP cells were differentiated to macrophages as origin THP-1  
701 using RPMI 1640 medium supplemented with 10% FBS, 1% P/S and PMA. THP-1-ASC-  
702 GFP macrophages were treated with viral proteins in serum-free RPMI. Thirty minutes  
703 before the treatment termination, Hoechst33342 was added to stain cell nuclei. After 24 h of  
704 treatment cell culture medium was replaced to FluoroBrite DMEM. ASC specks were  
705 analysed with EVOS FL Auto fluorescent microscope (Life Technologies, USA) by taking  
706 photos with 20 $\times$  objective. Cells were counted according to the number of nuclei. ASC speck  
707 number per cell was counted using image processing program ImageJ.

### 708 **Measurement of active caspase-1**

709 Active caspase-1 was detected using Fluorescent Labeled Inhibitors of Caspases  
710 (FLICA) assay according to manufacturer's protocol. Briefly, FLICA reagent (FAM-YVAD-  
711 FMK – caspase-1 inhibitor probe) was added after the 15 h treatment with viral proteins and  
712 incubated for 1 h. Cells were washed three times and stained with Hoechst33342 at 1  $\mu$ g/ml  
713 and PI at 1.25  $\mu$ g/mL. After washing cells were analysed directly by fluorescence microscope  
714 EVOS FL Auto using a 20 $\times$  or 40 $\times$  objective.

### 715 **SDS-PAGE and Western blot analysis**

716 To determine cleaved caspase-1 p20 fragment Western-blot assay (WB) was  
717 performed. After cell treatment with viral proteins, supernatant was collected and centrifuged  
718 at  $600 \times g$  for 10 min to remove cellular debris. Then, the protein content of the supernatants  
719 was concentrated 10x using centrifugal filters with 10 kDa cutoff (#UFC501096, Amicon,  
720 Merck). The concentrated samples were boiled in a reducing sample buffer and separated in  
721 4-12% polyacrylamide gel (#NW04122BOX, ThermoFisher Scientific) electrophoresis  
722 (PAGE) in MES SDS running buffer (#B0002 Invitrogen, ThermoFisher Scientific). The  
723 proteins from the SDS-PAGE gel were blotted onto 0.2  $\mu\text{m}$  nitrocellulose (NC) membrane  
724 (#LC2000, Invitrogen, ThermoFisher Scientific) by wet transfer. The membrane was blocked  
725 with 5% BSA in PBS for 1 h at RT and rinsed with TBST. The membrane was then incubated  
726 with primary antibodies in TBST with 1% BSA overnight at 4 °C. The primary antibodies  
727 against human caspase-1 (clone Bally-1, #AG-20B-0048-C100, Adipogene) were used at  
728 1:1000 dilution. Thereafter, the membrane was incubated with secondary antibodies Goat  
729 Anti-Mouse IgG (H+L)-HRP Conjugate (Bio-Rad) diluted 1:5000 in TBST with 1% BSA for  
730 1 h at RT. The horseradish peroxidase (HRP) enzymatic reaction was developed using  
731 chemiluminescent substrate (#34094, ThermoFisher Scientific).

### 732 **Immunocytochemistry for studying the uptake of VLPs by macrophages**

733 Cells were stained in IbidiTreat 96 well  $\mu$ -plates. After the treatment cells were  
734 washed with PBS and fixed in 4% PFA dissolved in PBS for 15 min and permeabilised with  
735 0.1% Triton X-100 prepared in PBS for 10 min. Blocking solution – PBS containing 2% BSA  
736 was applied for 30 min followed by two washing steps. The primary antibodies rabbit  
737 polyclonal anti-CD68 (1:100; #25747-1-AP, Proteintech) and mouse anti-PyV VP1 VLPs  
738 (monoclonal antibodies of hybridoma supernatant at dilution 1:2) were added to the blocking  
739 solution and incubated overnight. The following secondary antibodies were used  
740 respectively: goat anti-rabbit (1:1000) and goat anti-mouse (1:1000). The secondary  
741 antibodies were applied for 2 h followed by two washing steps. Hoechst33342 was used for  
742 nuclear staining at 1  $\mu\text{g}/\text{mL}$  for 30 min in PBS. The images were taken using a 40 $\times$  objective.  
743 CD68 was used as a macrophage and lysosomal marker. The experiment was imaged using  
744 EVOS FL Auto fluorescence microscope (ThermoFisher Scientific, USA). Acquired images  
745 were processed using ImageJ (Wayne Rusband; National Institute of Health, Bethesda, MD,  
746 USA).

747 For the immunocytochemistry, in-house generated murine MAbs against recombinant  
748 NLPs and VLPs were used (#MAb clone – virus antigen indicated): #7C11 – MeV N  
749 (Zvirbliene *et al.*, 2007); #5E3 – MuV N (Samuel *et al.*, 2002b); #5G8 – KIPyV VP1; #11A2  
750 – MCPyV VP1.

### 751 **Microscopy**

752 All images were taken with fluorescence microscope EVOS FL Auto (#AMAFD1000,  
753 ThermoFisher Scientific). EVOS imaging systems use LED light cubes, which combine bright  
754 LED illumination with excitation and emission filters into single components. PI signal was  
755 detected in RFP light cube; Hoechst33342 signal – in DAPI light cube (AMEP#4650); GFP  
756 and AlexaFluor 488 signal – in GFP light cube (AMEP#4651); PI signal – in RFP light cube  
757 (AMEP#4652); AlexaFluor 594 signal – in TxRed light cube (AMEP#4655). The following  
758 objective lenses were used 20 $\times$  (#AMEP4682) and 40 $\times$  (#AMEP4683). Acquisition software  
759 EVOS® FL Auto v1.6 was used. Images were prepared with Image J program. Firstly,  
760 appropriate pseudo-colour was added at images of 8-bit format. Then, the images were  
761 converted to RGB colour format. Finally, brightness and contrast were adjusted equally to all  
762 images per channel. Images (fluorescent signal and object counting) were analysed with

763 ImageJ. The final figures were arranged using Adobe Photoshop without any  
764 brightness/contrast and colour manipulations.

## 765 **Cell preparation for single cell RNA sequencing**

766 THP-1 macrophages for RNA sequencing analysis were treated for 15 h with PyV-  
767 derived VLPs (20 µg/ml). After the treatment cells were washed with PBS and detached with  
768 TrypLE reagent after 15 min incubation at cell culture incubator (37 °C, 5% CO<sub>2</sub>). After  
769 centrifugation cells were washed twice with 1x RNase-free PBS (cat#AM9624, Invitrogen).  
770 After final centrifugation cells were resuspended in RNase-free PBS and kept on ice till cell  
771 preparation for RNA sequencing analysis

## 772 **Single-cell RNA sequencing**

773 Single-cell RNA sequencing (scRNAseq) was performed using a modified version of the  
774 inDrops method (Klein *et al*, 2015; Zilionis *et al*, 2017) While the original version is based  
775 on the CEL-Seq protocol (Hashimshony *et al*, 2012) that involves linear cDNA amplification  
776 by *in vitro* transcription, the modified version relies on template switching and cDNA  
777 amplification by PCR, as in the Smart-seq protocol (Ramsköld *et al*, 2012). First, single cell  
778 transcriptomes were barcoded in 1-nl droplets by co-encapsulating: i) barcoding hydrogel  
779 beads; ii) the reverse-transcription/lysis (RT/lysis) mix; and iii) the cell suspension. Cell  
780 encapsulation was performed using the microfluidic device described in (Zilionis *et al.*, 2017)  
781 on an Onyx platform (Droplet Genomics). Maxima H- minus (ThermoFisher, cat. no.  
782 EP0751) was used for reverse-transcription with template switching. RT was performed for  
783 1h at 42 °C followed by heat inactivation for 5 min at 85 °C. The emulsion was then broken  
784 and the pooled material was taken through library preparation for Illumina sequencing, which  
785 involves the following steps: i) cDNA amplification (Terra PCR direct Polymerase, Takara,  
786 cat. no. 639270), ii) fragmentation and adapter ligation (NEBNext® Ultra™ II FS DNA  
787 Library Prep Kit for Illumina, NEB, cat. no. E7805S), and iii) indexing PCR (KAPA HiFi  
788 HotStart ReadyMix PCR Kit, Roche, cat. no. KK2601). Sequencing was performed on a  
789 single Illumina NextSeq run (NextSeq 500/550 High Output Kit v2.5 (75 Cycles), Illumina,  
790 cat. no. 20024906).

## 791 **ScRNAseq raw data processing**

792 The [solo-in-drops](https://github.com/jsimonas/solo-in-drops) pipeline (<https://github.com/jsimonas/solo-in-drops>), which is a wrapper  
793 around [STARsolo](https://github.com/alexdobin/STAR/blob/master/docs/STARsolo.md) (<https://github.com/alexdobin/STAR/blob/master/docs/STARsolo.md>),  
794 was used for obtain cells x genes expression matrices. STARsolo expects as input two fastq  
795 files per library, one containing the barcode information and the other the transcript  
796 information. Meanwhile, the custom scRNAseq protocol used in the current study outputs 3  
797 fastq files per library: barcode half 1, barcode half 2, and transcript. Solo-in-drops prepares  
798 the data for compatibility with STARsolo. STAR (version 2.7.6a) was run with the following  
799 parameters: -- soloType CB\_UMI\_Simple, -- soloUMIfiltering MultiGeneUMI, --  
800 soloCBmatchWLtype IMM\_multi\_pseudocounts. Homo sapiens (human) genome  
801 assembly GRCh38 (hg38) was used as the reference.

## 802 **ScRNAseq count data analysis**

803 Jupyter notebooks with commented code for scRNAseq data analyses, including data  
804 filtering, normalization, visualization, clustering, cell population annotation, differential gene  
805 expression (DGE) analysis, cell cycle scoring, and plots used in Figures 9-11 and EV9-11 are  
806



807 provided on GitHub ([github.com/rapolaszilionis/Luciunaite\\_et\\_al\\_2022](https://github.com/rapolaszilionis/Luciunaite_et_al_2022)). The Scanpy  
808 toolbox was used for data analysis. Transcriptomes with fewer than 900 total counts were  
809 excluded. No filtering on the fraction of mitochondrial counts was performed. UMAP (Becht  
810 *et al*, 2018) was used for data visualization in 2D. Leiden clustering was used to divide the  
811 graph into clusters, which were annotated based on their gene expression profiles. Gene  
812 Ontology (GO) gene set enrichment analysis (Fig. 9D, 10E) was performed using the tool  
813 available online (<http://geneontology.org>) using Panther GO-Slim Biological Processes as the  
814 annotation data set. For DGE analyses (Figs. 9C, 10E), the Mann-Whitney U test was used to  
815 test for significance, and the Benjamini-Hochberg procedure was used to correct for multiple  
816 hypothesis testing.

## 817 **Statistical analysis**

818 All statistical analyses were performed with GraphPad Prism 9.2.0 (GraphPad  
819 Software, Inc., La Jolla, CA). The data in the figures are represented as individual data points  
820 from at least 6 independent experiments using box plots (showing minimum, first quartile,  
821 median, third quartile and maximum) or bar graphs. Independent experiments referred to as N  
822 means the number of independent cell culture preparations and n means the number of  
823 technical repeats. Normality test was carried out to test if the values come from a Gaussian  
824 distribution. Statistical comparisons of vehicle controls versus treatment were performed with  
825 one-way ANOVA in conjunction with a Tukey's multiple comparison test or Student's t-test.  
826 A Kruskal-Wallis test with Dunn's post hoc test was used for non-parametric data.  
827 Differences with p value less than 0.05 were considered to be statistically significant: \*p <  
828 0.05, \*\*p < 0.01, \*\*\*p < 0.001, \*\*\*\*p < 0.0001. To emphasise non-significant results ns was  
829 used.

## 830 **Acknowledgements**

831 This study was supported by the Research Council of Lithuania, grant No. S-SEN-20-11.

832 We would like to thank prof. L. Mažutis for cell line THP-1.

## 833 **Author Contributions**

834 Asta Lučiūnaitė designed experiments, analysed the data and wrote the manuscript. Indrė  
835 Dalgėdienė and Kristina Mašalaitė contributed to the experiments and manuscript writing.  
836 Milda Norkienė was responsible for VLP preparation. Andrius Šinkūnas performed single-  
837 cell RNA sequencing. Rapolas Žilionis was responsible for single-cell RNA sequencing  
838 analysis. Indrė Kučinskaitė-Kodžė and Alma Gedvilaitė helped to design the experiments and  
839 were responsible for manuscript revision. Aurelija Žvirblienė was responsible for the final  
840 manuscript revision. All of the authors reviewed the manuscript and approved its final  
841 version.

## 842 **Conflicts of Interest**

843 R.Ž. and A.Š. are employed at Droplet Genomics. R.Z. is a shareholder at Droplet Genomics.  
844 These commercial relationships are unrelated to the current study. All authors declare no  
845 conflict of interest regarding the publication of this paper.

## 846 **Data Availability**



847 Single-cell RNAseq-related datasets and computer code produced in this study are available  
848 in the following databases:

- 849 • Fastq files and count matrices Gene Expression Omnibus GSEXXXXX  
850 (<https://www.ncbi.nlm.nih.gov/geo/query/acc.cgi?acc=GSEXXXXX>)
- 851 • Code for analyses and figures: GitHub  
852 ([https://github.com/rapolaszilionis/Luciunaite\\_et\\_al\\_2022](https://github.com/rapolaszilionis/Luciunaite_et_al_2022))

853 All other data used to support the findings of this study are included within the article.

## 854 References

- 855 Adamik J, Wang KZ, Unlu S, Su AJ, Tannahill GM, Galson DL, O'Neill LA, Auron PE (2013) Distinct  
856 mechanisms for induction and tolerance regulate the immediate early genes encoding interleukin 1 $\beta$  and tumor  
857 necrosis factor  $\alpha$ . *PLoS One* 8: e70622
- 858 Alam S, Liu Q, Liu S, Liu Y, Zhang Y, Yang X, Liu G, Fan K, Ma J (2019) Up-regulated cathepsin C induces  
859 macrophage M1 polarization through FAK-triggered p38 MAPK/NF- $\kappa$ B pathway. *Exp Cell Res* 382: 111472
- 860 Baldanta S, Fernández-Escobar M, Acín-Perez R, Albert M, Camafeita E, Jorge I, Vázquez J, Enríquez JA,  
861 Guerra S (2017) ISG15 governs mitochondrial function in macrophages following vaccinia virus infection.  
862 *PLoS Pathog* 13: e1006651
- 863 Baranov MV, Kumar M, Sacanna S, Thutupalli S, van den Bogaart G (2020) Modulation of Immune Responses  
864 by Particle Size and Shape. *Front Immunol* 11: 607945
- 865 Becht E, McInnes L, Healy J, Dutertre CA, Kwok IWH, Ng LG, Ginhoux F, Newell EW (2018) Dimensionality  
866 reduction for visualizing single-cell data using UMAP. *Nat Biotechnol*
- 867 Booth V, Keizer DW, Kamphuis MB, Clark-Lewis I, Sykes BD (2002) The CXCR3 binding chemokine IP-  
868 10/CXCL10: structure and receptor interactions. *Biochemistry* 41: 10418-10425
- 869 Bouchon A, Hernández-Munain C, Cella M, Colonna M (2001) A DAP12-mediated pathway regulates  
870 expression of CC chemokine receptor 7 and maturation of human dendritic cells. *J Exp Med* 194: 1111-1122
- 871 Brini M, Carafoli E (2011) The plasma membrane Ca<sup>2+</sup> ATPase and the plasma membrane sodium calcium  
872 exchanger cooperate in the regulation of cell calcium. *Cold Spring Harb Perspect Biol* 3
- 873 Butovsky O, Jedrychowski MP, Moore CS, Cialic R, Lanser AJ, Gabriely G, Koeglspenger T, Dake B, Wu PM,  
874 Doykan CE *et al* (2014) Identification of a unique TGF- $\beta$ -dependent molecular and functional signature in  
875 microglia. *Nat Neurosci* 17: 131-143
- 876 Callahan V, Hawks S, Crawford MA, Lehman CW, Morrison HA, Ivester HM, Akhrymuk I, Boghdeh N, Flor  
877 R, Finkielstein CV *et al* (2021) The Pro-Inflammatory Chemokines CXCL9, CXCL10 and CXCL11 Are  
878 Upregulated Following SARS-CoV-2 Infection in an AKT-Dependent Manner. *Viruses* 13
- 879 Canton J (2018) Macropinocytosis: New Insights Into Its Underappreciated Role in Innate Immune Cell  
880 Surveillance. *Front Immunol* 9: 2286
- 881 Carlton J, Bujny M, Rutherford A, Cullen P (2005) Sorting nexins--unifying trends and new perspectives.  
882 *Traffic* 6: 75-82
- 883 Carta S, Semino C, Sitia R, Rubartelli A (2017) Dysregulated IL-1 $\beta$  Secretion in Autoinflammatory Diseases: A  
884 Matter of Stress? *Front Immunol* 8: 345
- 885 Chang AC, Jellinek DA, Reddel RR (2003) Mammalian stanniocalcins and cancer. *Endocr Relat Cancer* 10:  
886 359-373
- 887 Chanput W, Mes JJ, Wichers HJ (2014) THP-1 cell line: An in vitro cell model for immune modulation  
888 approach. *International Immunopharmacology* 23: 37-45
- 889 Cheng Z, Guo J, Chen L, Luo N, Yang W, Qu X (2015) Overexpression of TMEM158 contributes to ovarian  
890 carcinogenesis. *J Exp Clin Cancer Res* 34: 75
- 891 Cheriya V, Leaman DW, Borden EC (2011) Emerging roles of FAM14 family members (G1P3/ISG 6-16 and  
892 ISG12/IFI27) in innate immunity and cancer. *J Interferon Cytokine Res* 31: 173-181
- 893 Codolo G, Plotegher N, Pozzobon T, Brucale M, Tessari I, Bubacco L, de Bernard M (2013) Triggering of  
894 inflammasome by aggregated  $\alpha$ -synuclein, an inflammatory response in synucleinopathies. *PLoS One* 8: e55375
- 895 Cook DN (1996) The role of MIP-1 alpha in inflammation and hematopoiesis. *J Leukoc Biol* 59: 61-66
- 896 Dalgediene I, Luciunaite A, Zvirbliene A (2018) Activation of Macrophages by Oligomeric Proteins of  
897 Different Size and Origin. *Mediators of Inflammation*: 13
- 898 de Alba E (2019) Structure, interactions and self-assembly of ASC-dependent inflammasomes. *Archives of*  
899 *Biochemistry and Biophysics* 670: 15-31

- 900 De Gascun CF, Carr MJ (2013) Human Polyomavirus Reactivation: Disease Pathogenesis and Treatment  
901 Approaches. *Clinical & Developmental Immunology*: 27
- 902 Dinarello CA (2018) Overview of the IL-1 family in innate inflammation and acquired immunity. *Immunol Rev*  
903 281: 8-27
- 904 Doshi N, Mitragotri S (2010) Macrophages Recognize Size and Shape of Their Targets. *Plos One* 5
- 905 Dostert C, Petrillic V, Van Bruggen R, Steele C, Mossman BT, Tschopp J (2008) Innate immune activation  
906 through Nalp3 inflammasome sensing of asbestos and silica. *Science* 320: 674-677
- 907 Fensterl V, Sen GC (2015) Interferon-induced Ifit proteins: their role in viral pathogenesis. *J Virol* 89: 2462-  
908 2468
- 909 Franklin BS, Latz E, Schmidt FI (2018) The intra- and extracellular functions of ASC specks. *Immunological*  
910 *Reviews* 281: 74-87
- 911 Fusco R, Siracusa R, Genovese T, Cuzzocrea S, Di Paola R (2020) Focus on the Role of NLRP3 Inflammasome  
912 in Diseases. *Int J Mol Sci* 21
- 913 Galati D, Srinivasan S, Raza H, Prabu SK, Hardy M, Chandran K, Lopez M, Kalyanaraman B, Avadhani NG  
914 (2009) Role of nuclear-encoded subunit Vb in the assembly and stability of cytochrome c oxidase complex:  
915 implications in mitochondrial dysfunction and ROS production. *Biochem J* 420: 439-449
- 916 Gasperini S, Marchi M, Calzetti F, Laudanna C, Vicentini L, Olsen H, Murphy M, Liao F, Farber J, Cassatella  
917 MA (1999) Gene expression and production of the monokine induced by IFN-gamma (MIG), IFN-inducible T  
918 cell alpha chemoattractant (I-TAC), and IFN-gamma-inducible protein-10 (IP-10) chemokines by human  
919 neutrophils. *J Immunol* 162: 4928-4937
- 920 Gozzelino R, Soares MP (2014) Coupling heme and iron metabolism via ferritin H chain. *Antioxid Redox Signal*  
921 20: 1754-1769
- 922 Grubman A, Choo XY, Chew G, Ouyang JF, Sun G, Croft NP, Rossello FJ, Simmons R, Buckberry S, Landin  
923 DV *et al* (2021) Transcriptional signature in microglia associated with A $\beta$  plaque phagocytosis. *Nat Commun*  
924 12: 3015
- 925 Halle A, Hornung V, Petzold GC, Stewart CR, Monks BG, Reinheckel T, Fitzgerald KA, Latz E, Moore KJ,  
926 Golenbock DT (2008) The NALP3 inflammasome is involved in the innate immune response to amyloid-beta.  
927 *Nature Immunology* 9: 857-865
- 928 Hammond TR, Dufort C, Dissing-Olesen L, Giera S, Young A, Wysoker A, Walker AJ, Gergits F, Segel M,  
929 Nemes J *et al* (2019) Single-Cell RNA Sequencing of Microglia throughout the Mouse Lifespan and in the  
930 Injured Brain Reveals Complex Cell-State Changes. *Immunity* 50: 253-271.e256
- 931 Hansen MT, Forst B, Cremers N, Quagliata L, Ambartsumian N, Grum-Schwensen B, Klingelhöfer J, Abdul-AI  
932 A, Herrmann P, Osterland M *et al* (2015) A link between inflammation and metastasis: serum amyloid A1 and  
933 A3 induce metastasis, and are targets of metastasis-inducing S100A4. *Oncogene* 34: 424-435
- 934 Hashimshony T, Wagner F, Sher N, Yanai I (2012) CEL-Seq: single-cell RNA-Seq by multiplexed linear  
935 amplification. *Cell Rep* 2: 666-673
- 936 Helfman DM, Kim EJ, Lukanidin E, Grigorian M (2005) The metastasis associated protein S100A4: role in  
937 tumour progression and metastasis. *Br J Cancer* 92: 1955-1958
- 938 Hornung V, Bauernfeind F, Halle A, Samstad EO, Kono H, Rock KL, Fitzgerald KA, Latz E (2008) Silica  
939 crystals and aluminum salts activate the NALP3 inflammasome through phagosomal destabilization. *Nature*  
940 *Immunology* 9: 847-856
- 941 Hynes RO (1986) Fibronectins. *Sci Am* 254: 42-51
- 942 Ish-Shalom E, Meirou Y, Sade-Feldman M, Kanterman J, Wang L, Mizrahi O, Klieger Y, Baniyash M (2016)  
943 Impaired SNX9 Expression in Immune Cells during Chronic Inflammation: Prognostic and Diagnostic  
944 Implications. *J Immunol* 196: 156-167
- 945 Ising C, Venegas C, Zhang S, Scheiblich H, Schmidt SV, Vieira-Saecker A, Schwartz S, Albasset S, McManus  
946 RM, Tejera D *et al* (2019) NLRP3 inflammasome activation drives tau pathology. *Nature* 575: 669-673
- 947 Ito T, Carson WF, Cavassani KA, Connett JM, Kunkel SL (2011) CCR6 as a mediator of immunity in the lung  
948 and gut. *Exp Cell Res* 317: 613-619
- 949 Jiang T, Tan L, Zhu XC, Zhang QQ, Cao L, Tan MS, Gu LZ, Wang HF, Ding ZZ, Zhang YD *et al* (2014)  
950 Upregulation of TREM2 ameliorates neuropathology and rescues spatial cognitive impairment in a transgenic  
951 mouse model of Alzheimer's disease. *Neuropsychopharmacology* 39: 2949-2962
- 952 Kelley N, Jeltema D, Duan Y, He Y (2019) The NLRP3 Inflammasome: An Overview of Mechanisms of  
953 Activation and Regulation. *Int J Mol Sci* 20
- 954 Klein AM, Mazutis L, Akartuna I, Tallapragada N, Veres A, Li V, Peshkin L, Weitz DA, Kirschner MW (2015)  
955 Droplet barcoding for single-cell transcriptomics applied to embryonic stem cells. *Cell* 161: 1187-1201
- 956 Kobayashi M, Konishi H, Sayo A, Takai T, Kiyama H (2016) TREM2/DAP12 Signal Elicits Proinflammatory  
957 Response in Microglia and Exacerbates Neuropathic Pain. *J Neurosci* 36: 11138-11150
- 958 Kominami E, Ishido K, Muno D, Sato N (1992) The primary structure and tissue distribution of cathepsin C.  
959 *Biol Chem Hoppe Seyler* 373: 367-373

- 960 Kornblihtt AR, Gutman A (1988) Molecular biology of the extracellular matrix proteins. *Biol Rev Camb Philos*  
961 *Soc* 63: 465-507
- 962 Kurten RC, Cadena DL, Gill GN (1996) Enhanced degradation of EGF receptors by a sorting nexin, SNX1.  
963 *Science* 272: 1008-1010
- 964 Lawlor N, Nehar-Belaid D, Grassmann JDS, Stoeckius M, Smibert P, Stitzel ML, Pascual V, Banchereau J,  
965 Williams A, Ucar D (2021) Single Cell Analysis of Blood Mononuclear Cells Stimulated Through Either LPS  
966 or Anti-CD3 and Anti-CD28. *Front Immunol* 12: 636720
- 967 Leung CCT, Wong CKC (2021) Characterization of stanniocalcin-1 expression in macrophage differentiation.  
968 *Transl Oncol* 14: 100881
- 969 Liu L, Zhang J, Li S, Yin L, Tai J (2020) Silencing of TMEM158 Inhibits Tumorigenesis and Multidrug  
970 Resistance in Colorectal Cancer. *Nutr Cancer* 72: 662-671
- 971 Liu Q, Zhang Y, Liu S, Liu Y, Yang X, Liu G, Shimizu T, Ikenaka K, Fan K, Ma J (2019) Cathepsin C  
972 promotes microglia M1 polarization and aggravates neuroinflammation via activation of Ca. *J*  
973 *Neuroinflammation* 16: 10
- 974 Lu Z, Lam KS, Wang N, Xu X, Cortes M, Andersen B (2006) LMO4 can interact with Smad proteins and  
975 modulate transforming growth factor-beta signaling in epithelial cells. *Oncogene* 25: 2920-2930
- 976 Luciuaitė A, McManus RM, Jankunec M, Racz I, Dansokho C, Dalgediene I, Schwartz S, Brosseron F,  
977 Heneka MT Soluble A beta oligomers and protofibrils induce NLRP3 inflammasome activation in microglia.  
978 *Journal of Neurochemistry*: 12
- 979 Luecken MD, Theis FJ (2019) Current best practices in single-cell RNA-seq analysis: a tutorial. *Mol Syst Biol*  
980 15: e8746
- 981 Ma J, Zhu F, Zhao M, Shao F, Yu D, Zhang X, Li W, Qian Y, Zhang Y, Jiang D *et al* (2021) SARS-CoV-2  
982 nucleocapsid suppresses host pyroptosis by blocking Gasdermin D cleavage. *EMBO J* 40: e108249
- 983 Maeda M, Hasegawa H, Hyodo T, Ito S, Asano E, Yuang H, Funasaka K, Shimokata K, Hasegawa Y,  
984 Hamaguchi M *et al* (2011) ARHGAP18, a GTPase-activating protein for RhoA, controls cell shape, spreading,  
985 and motility. *Mol Biol Cell* 22: 3840-3852
- 986 Maloney C, Jensen S, Gil-Rivas V, Goolkasian P (2013) Latent viral immune inflammatory response model for  
987 chronic multisymptom illness. *Medical Hypotheses* 80: 220-229
- 988 Mastroberardino PG, Iannicola C, Nardacci R, Bernassola F, De Laurenzi V, Melino G, Moreno S, Pavone F,  
989 Oliverio S, Fesus L *et al* (2002) 'Tissue' transglutaminase ablation reduces neuronal death and prolongs survival  
990 in a mouse model of Huntington's disease. *Cell Death Differ* 9: 873-880
- 991 Mesquita G, Silva T, Gomes AC, Oliveira PF, Alves MG, Fernandes R, Almeida AA, Moreira AC, Gomes MS  
992 (2020) H-Ferritin is essential for macrophages' capacity to store or detoxify exogenously added iron. *Sci Rep* 10:  
993 3061
- 994 Mrschtik M, Ryan KM (2015) Lysosomal proteins in cell death and autophagy. *FEBS J* 282: 1858-1870
- 995 Murakami T, Ockinger J, Yu J, Byles V, McColl A, Hofer AM, Horng T (2012) Critical role for calcium  
996 mobilization in activation of the NLRP3 inflammasome. *Proc Natl Acad Sci U S A* 109: 11282-11287
- 997 N'Diaye EN, Branda CS, Branda SS, Nevarez L, Colonna M, Lowell C, Hamerman JA, Seaman WE (2009)  
998 TREM-2 (triggering receptor expressed on myeloid cells 2) is a phagocytic receptor for bacteria. *J Cell Biol*  
999 184: 215-223
- 1000 Neu U, Hengel H, Blaum BS, Schowalter RM, Macejak D, Gilbert M, Wakarchuk WW, Imamura A, Ando H,  
1001 Kiso M *et al* (2012) Structures of Merkel cell polyomavirus VP1 complexes define a sialic acid binding site  
1002 required for infection. *PLoS Pathog* 8: e1002738
- 1003 Neu U, Wang J, Macejak D, Garcea RL, Stehle T (2011) Structures of the major capsid proteins of the human  
1004 Karolinska Institutet and Washington University polyomaviruses. *J Virol* 85: 7384-7392
- 1005 Norkiene M, Stonyte J, Ziogiene D, Mazeike E, Sasnauskas K, Gedvilaite A (2015a) Production of recombinant  
1006 VP1-derived virus-like particles from novel human polyomaviruses in yeast. *Bmc Biotechnology* 15
- 1007 Norkiene M, Stonyte J, Ziogiene D, Mazeike E, Sasnauskas K, Gedvilaite A (2015b) Production of recombinant  
1008 VP1-derived virus-like particles from novel human polyomaviruses in yeast. *BMC Biotechnol* 15: 68
- 1009 Oishi Y, Manabe I (2016) Macrophages in age-related chronic inflammatory diseases. *Npj Aging and*  
1010 *Mechanisms of Disease* 2: 8
- 1011 Orłowski GM, Colbert JD, Sharma S, Bogyo M, Robertson SA, Rock KL (2015) Multiple Cathepsins Promote  
1012 Pro-IL-1 $\beta$  Synthesis and NLRP3-Mediated IL-1 $\beta$  Activation. *J Immunol* 195: 1685-1697
- 1013 Osellame LD, Blacker TS, Duchon MR (2012) Cellular and molecular mechanisms of mitochondrial function.  
1014 *Best Pract Res Clin Endocrinol Metab* 26: 711-723
- 1015 Pan P, Shen M, Yu Z, Ge W, Chen K, Tian M, Xiao F, Wang Z, Wang J, Jia Y *et al* (2021) SARS-CoV-2 N  
1016 protein promotes NLRP3 inflammasome activation to induce hyperinflammation. *Nat Commun* 12: 4664
- 1017 Parisi L, Gini E, Baci D, Tremolati M, Fanuli M, Bassani B, Farronato G, Bruno A, Mortara L (2018)  
1018 Macrophage Polarization in Chronic Inflammatory Diseases: Killers or Builders? *J Immunol Res* 2018: 8917804



- 1019 Pavlova A, Krupa JC, Mort JS, Abrahamson M, Björk I (2000) Cystatin inhibition of cathepsin B requires  
1020 dislocation of the proteinase occluding loop. Demonstration By release of loop anchoring through mutation of  
1021 his110. *FEBS Lett* 487: 156-160
- 1022 Peng YC, Lenschow DJ (2018) ISG15 in antiviral immunity and beyond. *Nat Rev Microbiol* 16: 423-439
- 1023 Pike AF, Varanita T, Herrebout MAC, Plug BC, Kole J, Musters RJP, Teunissen CE, Hoozemans JJM, Bubacco  
1024 L, Veerhuis R (2021)  $\alpha$ -Synuclein evokes NLRP3 inflammasome-mediated IL-1 $\beta$  secretion from primary  
1025 human microglia. *Glia* 69: 1413-1428
- 1026 Pollard AJ, Bijker EM (2020) A guide to vaccinology: from basic principles to new developments. *Nat Rev*  
1027 *Immunol*
- 1028 Rabolli V, Lison D, Huaux F (2016a) The complex cascade of cellular events governing inflammasome  
1029 activation and IL-1 beta processing in response to inhaled particles. *Particle and Fibre Toxicology* 13: 17
- 1030 Rabolli V, Lison D, Huaux F (2016b) The complex cascade of cellular events governing inflammasome  
1031 activation and IL-1 $\beta$  processing in response to inhaled particles. *Part Fibre Toxicol* 13: 40
- 1032 Raman D, Sobolik-Delmaire T, Richmond A (2011) Chemokines in health and disease. *Exp Cell Res* 317: 575-  
1033 589
- 1034 Ramsköld D, Luo S, Wang YC, Li R, Deng Q, Faridani OR, Daniels GA, Khrebtkova I, Loring JF, Laurent LC  
1035 *et al* (2012) Full-length mRNA-Seq from single-cell levels of RNA and individual circulating tumor cells. *Nat*  
1036 *Biotechnol* 30: 777-782
- 1037 Rashidi M, Bandala-Sanchez E, Lawlor KE, Zhang Y, Neale AM, Vijayaraj SL, O'Donoghue R, Wentworth JM,  
1038 Adams TE, Vince JE *et al* (2018) CD52 inhibits Toll-like receptor activation of NF- $\kappa$ B and triggers apoptosis to  
1039 suppress inflammation. *Cell Death Differ* 25: 392-405
- 1040 Rashidi M, Wicks IP, Vince JE (2020) Inflammasomes and Cell Death: Common Pathways in Microparticle  
1041 Diseases. *Trends Mol Med* 26: 1003-1020
- 1042 Sajid M, Ullah H, Yan K, He M, Feng J, Shereen MA, Hao R, Li Q, Guo D, Chen Y *et al* (2021) The Functional  
1043 and Antiviral Activity of Interferon Alpha-Inducible IFI6 Against Hepatitis B Virus Replication and Gene  
1044 Expression. *Front Immunol* 12: 634937
- 1045 Samstad EO, Niyonzima N, Nymo S, Aune MH, Ryan L, Bakke SS, Lappegard KT, Brekke OL, Lambris JD,  
1046 Damas JK *et al* (2014) Cholesterol Crystals Induce Complement-Dependent Inflammasome Activation and  
1047 Cytokine Release. *Journal of Immunology* 192: 2837-2845
- 1048 Samuel D, Sasnauskas K, Jin L, Beard S, Zvirbliene A, Gedvilaite A, Cohen B (2002a) High level expression of  
1049 recombinant mumps nucleoprotein in *Saccharomyces cerevisiae* and its evaluation in mumps IgM serology.  
1050 *Journal of Medical Virology* 66: 123-130
- 1051 Samuel D, Sasnauskas K, Jin L, Beard S, Zvirbliene A, Gedvilaite A, Cohen B (2002b) High level expression of  
1052 recombinant mumps nucleoprotein in *Saccharomyces cerevisiae* and its evaluation in mumps IgM serology. *J*  
1053 *Med Virol* 66: 123-130
- 1054 Samuel D, Sasnauskas K, Jin L, Gedvilaite A, Slibinskas R, Beard S, Zvirbliene A, Oliveira SA, Staniulis J,  
1055 Cohen B *et al* (2003) Development of a measles specific IgM ELISA for use with serum and oral fluid samples  
1056 using recombinant measles nucleoprotein produced in *Saccharomyces cerevisiae*. *Journal of Clinical Virology*  
1057 28: 121-129
- 1058 Sanyal S (2020) How SARS-CoV-2 (COVID-19) spreads within infected hosts - what we know so far. *Emerg*  
1059 *Top Life Sci* 4: 371-378
- 1060 Satoh J, Kino Y, Asahina N, Takitani M, Miyoshi J, Ishida T, Saito Y (2016) TMEM119 marks a subset of  
1061 microglia in the human brain. *Neuropathology* 36: 39-49
- 1062 Schett G, Neurath MF (2018) Resolution of chronic inflammatory disease: universal and tissue-specific  
1063 concepts. *Nat Commun* 9: 3261
- 1064 Schutyser E, Struyf S, Proost P, Opendakker G, Laureys G, Verhasselt B, Peperstraete L, Van de Putte I,  
1065 Saccani A, Allavena P *et al* (2002) Identification of biologically active chemokine isoforms from ascitic fluid  
1066 and elevated levels of CCL18/pulmonary and activation-regulated chemokine in ovarian carcinoma. *J Biol*  
1067 *Chem* 277: 24584-24593
- 1068 Selkrig J, Li N, Hausmann A, Mangan MSJ, Zietek M, Mateus A, Bobonis J, Sueki A, Imamura H, El Debs B *et*  
1069 *al* (2020) Spatiotemporal proteomics uncovers cathepsin-dependent macrophage cell death during *Salmonella*  
1070 infection. *Nature Microbiology* 5: 1119-+
- 1071 Shi G, Kenney AD, Kudryashova E, Zani A, Zhang L, Lai KK, Hall-Stoodley L, Robinson RT, Kudryashov DS,  
1072 Compton AA *et al* (2021) Opposing activities of IFITM proteins in SARS-CoV-2 infection. *EMBO J* 40:  
1073 e106501
- 1074 Shimizu H, Sakimoto T, Yamagami S (2019) Pro-inflammatory role of NLRP3 inflammasome in experimental  
1075 sterile corneal inflammation. *Sci Rep* 9: 9596
- 1076 Shu F, Shi Y (2018) Systematic Overview of Solid Particles and their Host Responses. *Frontiers in Immunology*  
1077 9: 15

- 1078 Slibinskas R, Samuel D, Gedvilaite A, Staniulis J, Sasnauskas K (2004) Synthesis of the measles virus  
1079 nucleoprotein in yeast *Pichia pastoris* and *Saccharomyces cerevisiae*. *J Biotechnol* 107: 115-124  
1080 Soares MP, Hamza I (2016) Macrophages and Iron Metabolism. *Immunity* 44: 492-504  
1081 Spence JS, He R, Hoffmann HH, Das T, Thinon E, Rice CM, Peng T, Chandran K, Hang HC (2019) IFITM3  
1082 directly engages and shuttles incoming virus particles to lysosomes. *Nat Chem Biol* 15: 259-268  
1083 Stahl-Meyer J, Stahl-Meyer K, Jäättelä M (2021) Control of mitosis, inflammation, and cell motility by limited  
1084 leakage of lysosomes. *Curr Opin Cell Biol* 71: 29-37  
1085 Swanson KV, Deng M, Ting JP (2019) The NLRP3 inflammasome: molecular activation and regulation to  
1086 therapeutics. *Nat Rev Immunol* 19: 477-489  
1087 Swanson MEV, Scotter EL, Smyth LCD, Murray HC, Ryan B, Turner C, Faull RLM, Dragunow M, Curtis MA  
1088 (2020) Identification of a dysfunctional microglial population in human Alzheimer's disease cortex using novel  
1089 single-cell histology image analysis. *Acta Neuropathol Commun* 8: 170  
1090 Takahashi K, Rochford CD, Neumann H (2005) Clearance of apoptotic neurons without inflammation by  
1091 microglial triggering receptor expressed on myeloid cells-2. *J Exp Med* 201: 647-657  
1092 Tominaga K, Yoshimoto T, Torigoe K, Kurimoto M, Matsui K, Hada T, Okamura H, Nakanishi K (2000) IL-12  
1093 synergizes with IL-18 or IL-1beta for IFN-gamma production from human T cells. *Int Immunol* 12: 151-160  
1094 Turnbull IR, Gilfillan S, Cella M, Aoshi T, Miller M, Piccio L, Hernandez M, Colonna M (2006) Cutting edge:  
1095 TREM-2 attenuates macrophage activation. *J Immunol* 177: 3520-3524  
1096 Vaine CA, Patel MK, Zhu JT, Lee E, Finberg RW, Hayward RC, Kurt-Jones EA (2013) Tuning Innate Immune  
1097 Activation by Surface Texturing of Polymer Microparticles: The Role of Shape in Inflammasome Activation.  
1098 *Journal of Immunology* 190: 3525-3532  
1099 Van Lint P, Libert C (2006) Matrix metalloproteinase-8: cleavage can be decisive. *Cytokine Growth Factor Rev*  
1100 17: 217-223  
1101 Volkert MR, Elliott NA, Housman DE (2000) Functional genomics reveals a family of eukaryotic oxidation  
1102 protection genes. *Proc Natl Acad Sci U S A* 97: 14530-14535  
1103 Wang J, Rousseau J, Kim E, Ehresmann S, Cheng YT, Duraine L, Zuo Z, Park YJ, Li-Kroeger D, Bi W *et al*  
1104 (2019) Loss of Oxidation Resistance 1, OXR1, Is Associated with an Autosomal-Recessive Neurological  
1105 Disease with Cerebellar Atrophy and Lysosomal Dysfunction. *Am J Hum Genet* 105: 1237-1253  
1106 Wang JT, Kerr MC, Karunaratne S, Jeanes A, Yap AS, Teasdale RD (2010) The SNX-PX-BAR family in  
1107 macropinocytosis: the regulation of macropinosome formation by SNX-PX-BAR proteins. *PLoS One* 5: e13763  
1108 Wang KX, Denhardt DT (2008) Osteopontin: role in immune regulation and stress responses. *Cytokine Growth*  
1109 *Factor Rev* 19: 333-345  
1110 Wang WB, Li G, Wu D, Luo Z, Pan P, Tian MF, Wang YC, Xiao F, Li AX, Wu KL *et al* (2018) Zika virus  
1111 infection induces host inflammatory responses by facilitating NLRP3 inflammasome assembly and interleukin-1  
1112 beta secretion. *Nature Communications* 9: 16  
1113 Weinreb C, Wolock S, Klein AM (2018) SPRING: a kinetic interface for visualizing high dimensional single-  
1114 cell expression data. *Bioinformatics* 34: 1246-1248  
1115 Wen G, Zhang C, Chen Q, Luong IA, Mustafa A, Ye S, Xiao Q (2015) A Novel Role of Matrix  
1116 Metalloproteinase-8 in Macrophage Differentiation and Polarization. *J Biol Chem* 290: 19158-19172  
1117 Wilson NS, Duewell P, Yang B, Li Y, Marsters S, Koernig S, Latz E, Maraskovsky E, Morelli AB, Schnurr M  
1118 *et al* (2014) Inflammasome-Dependent and -Independent IL-18 Production Mediates Immunity to the  
1119 ISCOMATRIX Adjuvant. *Journal of Immunology* 192: 3259-3268  
1120 Yángüez E, García-Culebras A, Frau A, Llompert C, Knobeloch KP, Gutierrez-Erlandsson S, García-Sastre A,  
1121 Esteban M, Nieto A, Guerra S (2013) ISG15 regulates peritoneal macrophages functionality against viral  
1122 infection. *PLoS Pathog* 9: e1003632  
1123 Zhang C, Yang M, Ericsson AC (2021) Function of Macrophages in Disease: Current Understanding on  
1124 Molecular Mechanisms. *Front Immunol* 12: 620510  
1125 Zhao X, Li J, Winkler CA, An P, Guo JT (2018) IFITM Genes, Variants, and Their Roles in the Control and  
1126 Pathogenesis of Viral Infections. *Front Microbiol* 9: 3228  
1127 Zhong L, Chen XF, Wang T, Wang Z, Liao C, Huang R, Wang D, Li X, Wu L, Jia L *et al* (2017) Soluble  
1128 TREM2 induces inflammatory responses and enhances microglial survival. *J Exp Med* 214: 597-607  
1129 Zhou X, Michal JJ, Zhang L, Ding B, Lunney JK, Liu B, Jiang Z (2013) Interferon induced IFIT family genes in  
1130 host antiviral defense. *Int J Biol Sci* 9: 200-208  
1131 Zilionis R, Nainys J, Veres A, Savova V, Zemmour D, Klein AM, Mazutis L (2017) Single-cell barcoding and  
1132 sequencing using droplet microfluidics. *Nat Protoc* 12: 44-73  
1133 Zvirbliene A, Kucinskaite I, Sezaite I, Samuel D, Sasnauskas K (2007) Mapping of B cell epitopes in measles  
1134 virus nucleocapsid protein. *Archives of Virology* 152: 25-39

## 1135 **Figure Legends**



1136 **Figure 1. The uptake of NLPs of measles and mumps viruses, and PyV-derived VLPs by**  
1137 **THP-1 macrophages.**

1138 THP-1 macrophages were treated with recombinant viral proteins for 24 h at 20 µg/ml  
1139 concentration. Cells were immunostained with anti-NLP and anti-VLP monoclonal  
1140 antibodies (red), anti-CD68 – macrophage and lysosomal marker (green), nuclear stain  
1141 Hoechst33342 (blue) and analysed by fluorescence microscopy. The negative control –  
1142 secondary antibody alone is referred as a control. Images were taken using 40× objective.  
1143 The scale bars indicate 100 µm. All experiments were performed in triplicate. Representative  
1144 images of one experiment are shown.

1145 **Figure 2. NLPs of measles and mumps viruses did not activate THP-1 macrophages.**

1146 A, B Macrophages were treated with viral proteins (20 µg/ml) for 24 h. Nigericin (10 µM)  
1147 was used as a positive control. (A) TNF-α and (B) IL-1β secretion determined by ELISA.  
1148 C, D Cytotoxicity assessed by (C) LDH assay and (D) PI and Hoechst nuclear staining. PI  
1149 indicates dead cells and Hoechst stains all cell nuclei. (E) Representation of the staining.  
1150 Images were taken using 20× objective. The scale bars indicate 200 µm.

1151

1152 Data information: Data are represented using box plots, \*p < 0.05, \*\*p < 0.01, \*\*\*p < 0.001,  
1153 \*\*\*\*p < 0.0001, one-way ANOVA followed by Tukey's multiple comparison test, stars show  
1154 statistically significant results compared to control.

1155 **Figure 3. PyV-derived VLPs induced release of inflammatory cytokines TNF-α and IL-6**  
1156 **and activated NLRP3 inflammasome in human THP-1 macrophages.**

1157 A-C Macrophages were treated with PyV-derived VLPs (20 µg/ml) for 24 h. Inhibitor  
1158 MCC950 (1 µM) was added 30 min before treatment. (A) TNF-α, (B) IL-6, and (C) IL-1β  
1159 secretion determined by ELISA.

1160 D, E Cytotoxicity assessed by (D) LDH assay and (E) PI and Hoechst nuclear staining. PI  
1161 indicates dead cells (red) and Hoechst stains all cell nuclei (blue).

1162 Data information: Data are represented using box plots with dots showing independent  
1163 experiments, \*p < 0.05, \*\*p < 0.01, \*\*\*p < 0.001, \*\*\*\*p < 0.0001, one-way ANOVA  
1164 followed by Tukey's multiple comparison test.

1165 **Figure 4. PyV-derived VLPs induced ASC speck formation in human THP-1**  
1166 **macrophages.**

1167 A, B THP-1-ASC-GFP macrophages were treated for 24 h with PyV-derived VLPs (20  
1168 µg/ml), inhibitor MCC950 (1 µM) was added 30 min before treatment. Formation of ASC  
1169 specks was visualised by fluorescent microscope. (A) Representative images of one  
1170 experiment. Grey arrows show ASC specks. Red rectangles show magnified parts. "+" –  
1171 refers to MCC950 pre-treatment. The images were taken using 20× objective. (B)  
1172 Quantification of ASC speck count per cell.

1173 C, D Time lapse of PyV VLP-induced cell activation. (C) LDH assay was performed of cell  
1174 culture supernatant in wilde-type THP-1 macrophages. (D) The formation of ASC specks  
1175 detected in THP-1-ASC-GFP. Representative images of one experiment are shown. N = 1.

1176 Data information: ASC images were taken using 20× objective. The scale bars indicate 200  
1177 µm. For (B) data are represented using box plots with dots showing independent experiments,  
1178 \*p < 0.05, \*\*p < 0.01, \*\*\*p < 0.001, \*\*\*\*p < 0.0001, one-way ANOVA followed by  
1179 Tukey's multiple comparison test. For (C) and (D) N = 1.

1180 **Figure 5. PyV-derived VLPs induced caspase-1 activation in human THP-1**  
1181 **macrophages.**

1182 A–C Macrophages were treated for 15 h with PyV-derived VLPs (20 µg/ml), inhibitor  
1183 MCC950 (1 µM) was added 30 min before treatment. (A) Cleaved caspase-1 was determined  
1184 in cell supernatants by WB. Caspase-1: 50 kDa – pro-caspase-1; 20 kDa – cleaved caspase-1  
1185 (p20). “+” – refers to MCC950 pre-treatment. Duplicates of one experiment are shown. (A)  
1186 Representative images of the activated caspase-1 staining by FLICA (green) reagent. Dead  
1187 cell nuclear stain PI (red) and nuclear stain Hoechst (blue) was used. The images were taken  
1188 using 20× objective. The scale bars indicate 100 µm. (C) Caspase-1 quantification according  
1189 to FLICA analysis, n = 40 photos per condition.

1190 Data information: N = 1 independent experiment. For (C) data are represented using box-  
1191 plots showing number of photos and analysed by Kruskal–Wallis test with Dunn's post hoc,  
1192 \*p < 0.05, \*\*p < 0.01, \*\*\*p < 0.001, \*\*\*\*p < 0.0001.

1193 **Figure 6. Cathepsin B inhibitor reduced VLP-induced IL-1β release while pan-**  
1194 **cathepsin inhibitor (K777) decreased both IL-1β release and cell death in human THP-1**  
1195 **macrophages.**

1196 A, H Macrophages were treated with PyV-derived VLPs (20 µg/ml) for 24 h. Inhibitors CA-  
1197 074 Me (2 or 10 µM) and K777 (15 µM) were added 30 min before treatment. (A, H) IL-1β  
1198 secretion by ELISA.

1199 B–G Cytotoxicity assessed by (B, D, F) LDH assay and (C, E, G) PI and Hoechst nuclear  
1200 staining. PI indicates dead cells (red) and Hoechst stains all cell nuclei (blue).

1201 Data information: Data are represented using box plots with dots showing independent  
1202 experiments, \*p < 0.05, \*\*p < 0.01, \*\*\*p < 0.001, \*\*\*\*p < 0.0001, one-way ANOVA  
1203 followed by Tukey's multiple comparison test.

1204 **Figure 7. K<sup>+</sup> ion efflux inhibitor (glybenclamide) reduced PyV VLP-induced cell death**  
1205 **and IL-1β release in human THP-1 macrophages.**

1206 A Macrophages were treated with PyV-derived VLPs (20 µg/ml) for 24 h. Inhibitor  
1207 glybenclamide (50 µM) was added 30 min before treatment. (A) Cytotoxicity assessed by  
1208 LDH assay.

1209 B IL-1β secretion determined by ELISA.

1210 Data information: Data are represented using box plots with dots showing independent  
1211 experiments, \*p < 0.05, \*\*p < 0.01, \*\*\*p < 0.001, \*\*\*\*p < 0.0001, one-way ANOVA  
1212 followed by Tukey's multiple comparison test.

1213 **Figure 8. PyV-derived VLPs activated NLRP3 inflammasome in primary human**  
1214 **macrophages-derived from peripheral blood mononuclear cells.**

1215 A–C Macrophages were treated for 15 h with PyV-derived VLPs (20 µg/ml), inhibitor  
1216 MCC950 (1 µM) was added 30 min before treatment. Cells were stained for activated  
1217 caspase-1 using FLICA (green), dead cell nuclear stain PI (red) and nuclear stain Hoechst  
1218 (blue) (A). The images were taken using 20× objective. Representative images of the staining  
1219 are shown. The scale bars indicate 100 µm. (B) Quantification of dead cells, n = 25 photos  
1220 per condition. (C) Caspase-1 quantification according to FLICA analysis, n = 25 photos per  
1221 condition.

1222 D, E After 24 h treatment with PyV-derived VLPs collected supernatants were analysed by  
1223 ELISA for (D) TNF-α and (E) IL-1β release, n = 3 technical repeats.

1224 Data information: N = 1 independent experiment. For (A–C) data were analysed using one-  
1225 way ANOVA followed by Tukey's multiple comparison test and represented using box plots

1226 with dots showing individual data points. For (D, E) Student's t-test was used and data were  
1227 represented using bar graphs (means±SD) with dots showing individual data points. \*p <  
1228 0.05, \*\*p < 0.01, \*\*\*p < 0.001, \*\*\*\*p < 0.0001.

1229 **Figure 9. ScRNAseq gene expression profiling of THP-1 macrophages stimulated with**  
1230 **PyV-derived VLPs.**

1231 A Experiment outline.

1232 B UMAP representation of scRNAseq data. Grey dots denote cells from all conditions  
1233 combined. Black dots highlight cells from a given condition. Numbers at the bottom indicate  
1234 the number of single cell transcriptomes post-filtering. The conventional mitochondrial count  
1235 filter (to remove dead cells) was intentionally omitted to enable the estimation of the fraction  
1236 of dead cells.

1237 C Volcano plots showing bulk-like differential genes expression analysis results.  
1238 Differentially expressed genes (DGEs) were defined as having an absolute fold-change > 1.5  
1239 and FDR < 0.05 (Mann-Whitney U test).

1240 D **Top:** Venn diagram showing the overlap between sets of genes enriched in KIPyV VLP-  
1241 treated cells relatively to control, MCPyV VLP-treated cells relatively to control and MCPyV  
1242 VLP-treated cells relatively to KIPyV VLPs. **Bottom:** GO enrichment analysis results for  
1243 each subset of genes shown in the Venn diagram. N.s. – no significant GO term enrichment.  
1244 Data information: To prepare (A) <https://biorender.com/> was used.

1245 **Figure 10. ScRNAseq revealed different cell populations within THP-1 macrophages**  
1246 **treated with PyV-derived VLPs.**

1247 A UMAP coloured by cell population annotation either combining all conditions (left) or split  
1248 by condition (right).

1249 B, C Percentages of cells per population for all data combined (B) or split by condition (C).

1250 D, E Results of population-enriched gene identification, including a population dendrogram  
1251 (D) based on hierarchical clustering (correlation distance measure, average linkage) by  
1252 enriched gene expression (E). Selected genes are highlighted at the bottom. Results of GO  
1253 enrichment analysis on selected genes groups are shown on top. CP10K – counts per 10,000.

1254 F Relative abundances of each population by condition. As this analysis is sensitive to the  
1255 total number of cells sampled by condition, cell counts from each condition were first  
1256 normalized to 10,000.

1257 G Relative abundance of cells at different cell cycle stages defined based on gene expression  
1258 scoring.

1259 **Figure 11. Genes enriched in both KIPyV and MCPyV VLP-treated cells have a very**  
1260 **similar expression pattern across the populations observed, except for the interferon-**  
1261 **response (IR) population.**

1262 A Expression of genes identified as enriched in KIPyV VLP-treated macrophages in the bulk-  
1263 like analysis (Fig 9C and D) at the individual population level in KIPyV VLP-treated  
1264 macrophages.

1265 B The equivalent of A for the MCPyV VLP-treatment condition.

1266 C Same Venn diagram as in Fig 9D.

1267 D-F Fold-changes in population abundance in pairwise comparisons of the three conditions  
1268 (Control, KIPyV VLP, MCPyV VLP).

1269 **Tables and their legends**

1270 Only expanded view tables uploaded as a separate file.

1271

- 1272 **Table EV1. Bulk-like scRNAseq data differential gene expression analysis results**  
1273
- 1274 **Table EV2. GO gene set enrichment analysis results for genes commonly enriched in**  
1275 **VLP treated samples**  
1276
- 1277 **Table EV3. Data underlying Fig 10E**
- 1278 **Expanded View Figure legends**
- 1279 **Figure EV9. Bulk-like scRNAseq data analysis**  
1280 Volcano plot showing the result of a bulk-like comparison of MCPyV vs KIPyV VLPs.  
1281 Differentially expressed genes (DGEs) were defined as having an absolute fold-change >1.5  
1282 and FDR < 0.05 (Mann-Whitney U test).
- 1283 **Figure EV10. UMAP plots combining all conditions coloured by expression of selected**  
1284 **genes.**  
1285 A-H Plots of enriched genes in separate populations are shown: (A) dead cells, (B) SS  
1286 population, (C) RS population, (D) MA population, (E) PA population, (F) HA population,  
1287 (G) AI and AII populations, and (H) IF population.  
1288 I Bar chart of average *TMEM158* expression in individual populations and conditions.  
1289 Condition order left-to-right: Control, KIPyV VLPs, MCPyV VLPs.
- 1290 **Figure EV11. Examples of genes enriched in different treatments – control, KIPyV and**  
1291 **MCPyV.**  
1292 A, B UMAP plots colored by expression of selected genes in each condition separately. For a  
1293 given gene, the 3 plots are saturated at the same absolute value to allow comparison. *IL1B*,  
1294 *CXCL1*, *CCL3*, and *CXCL8* are examples of genes upregulated in both KIPyV and MCPyV  
1295 conditions relatively to the control (A). *CXCL10*, *CXCL11*, *IFIT1*, and *ISG15* are expressed  
1296 in the MCPyV-specific IR population (B).  
1297



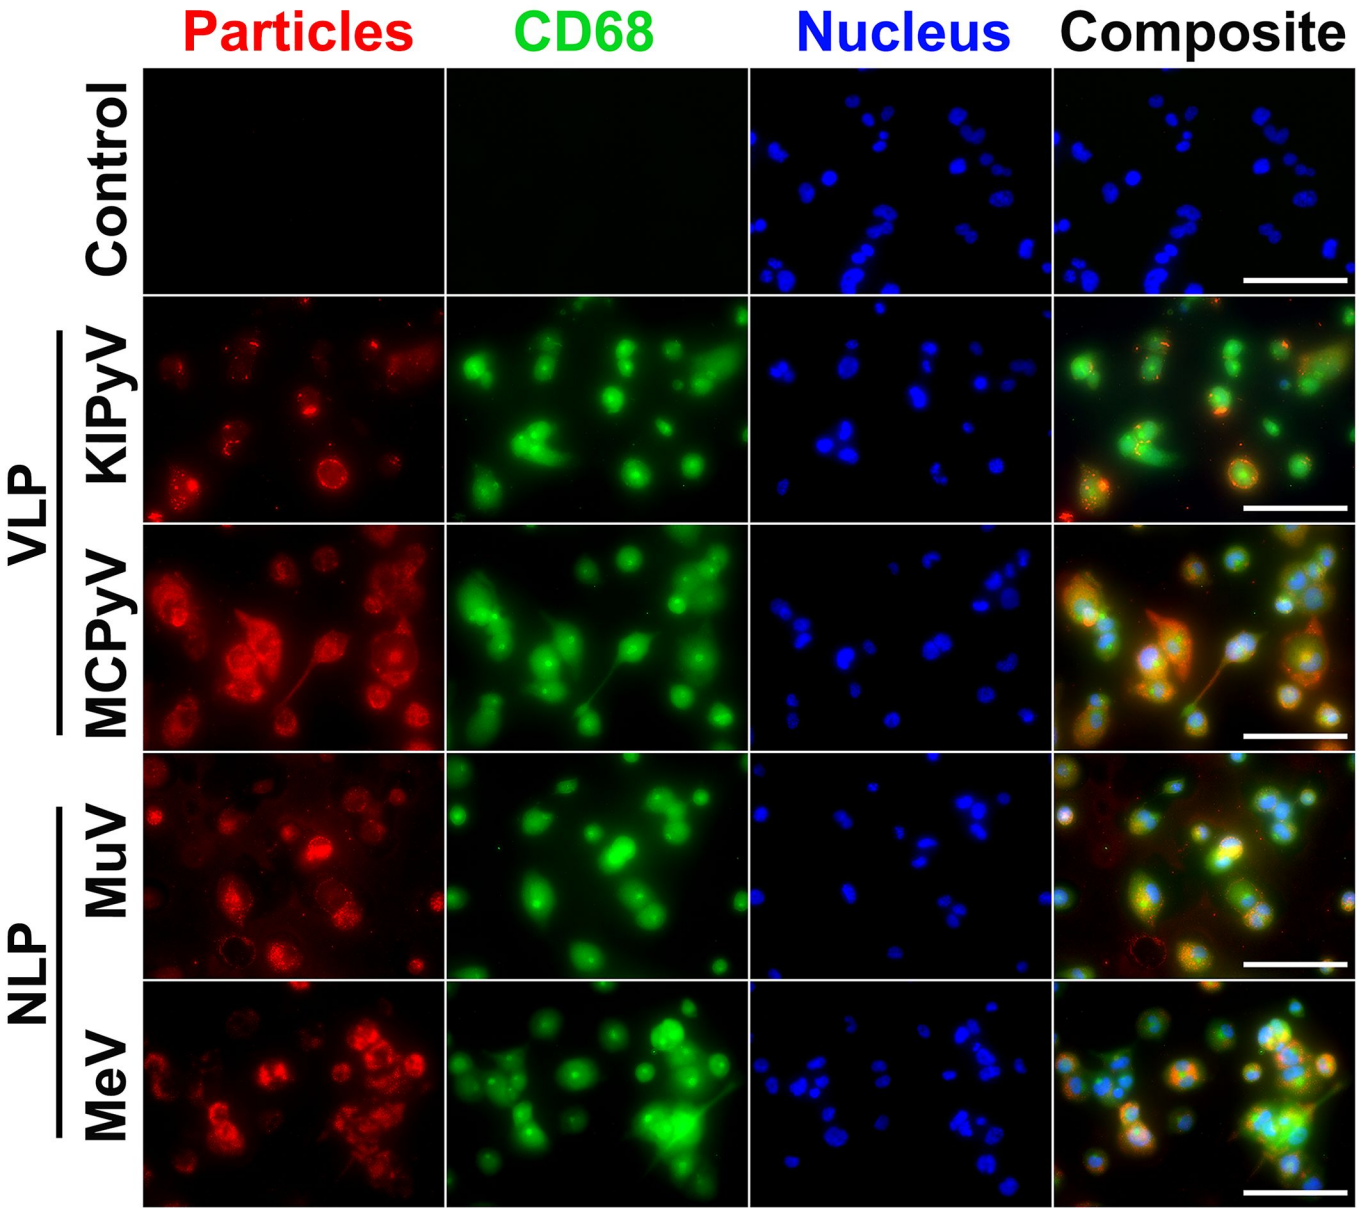

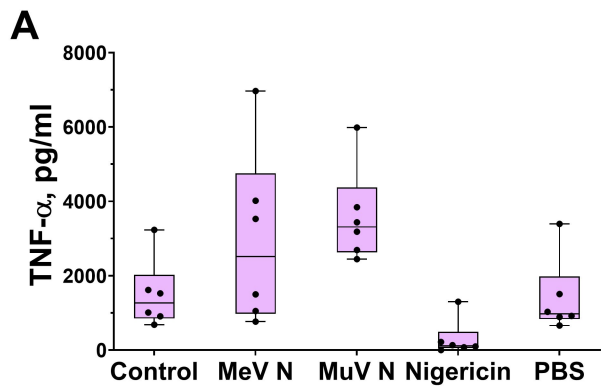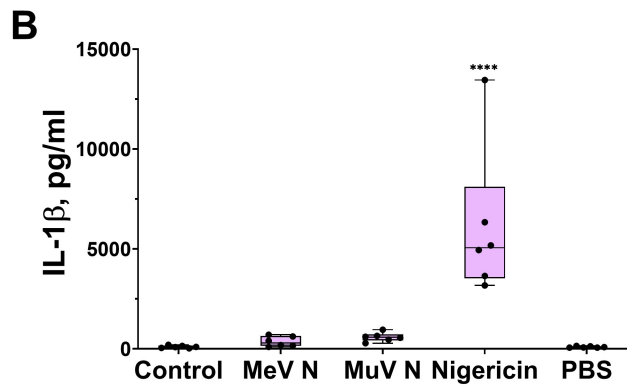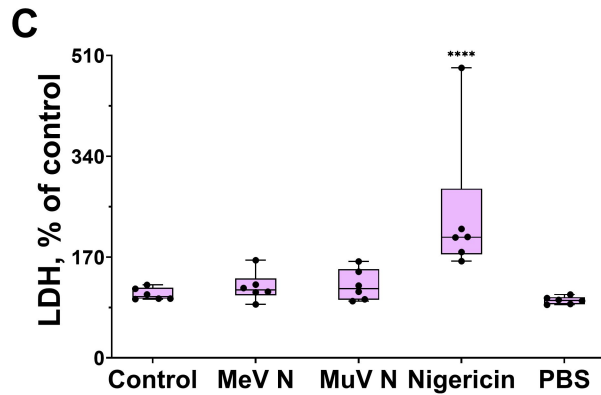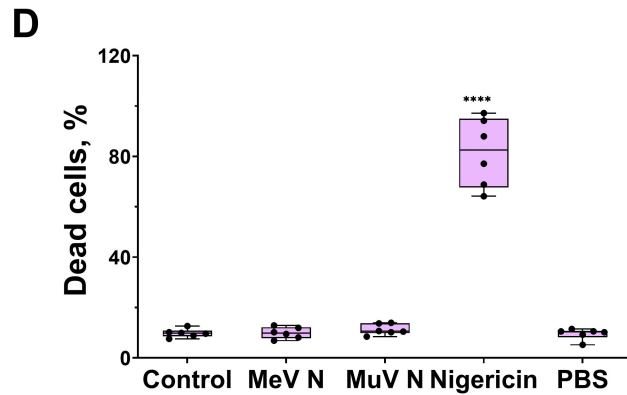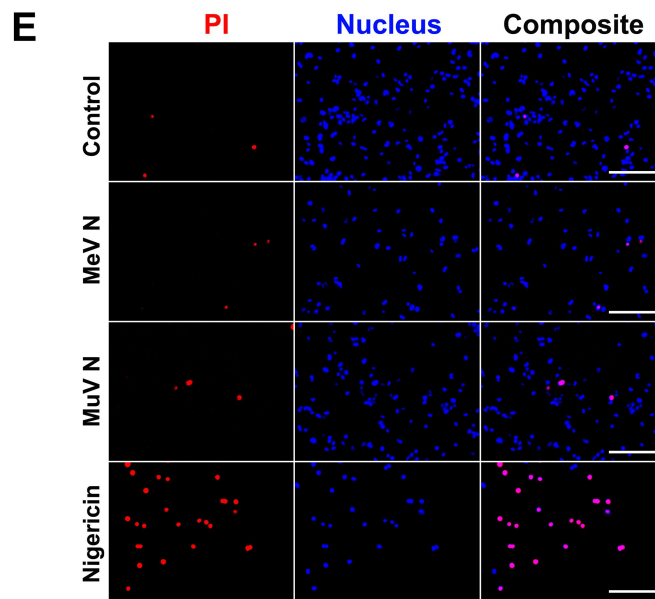

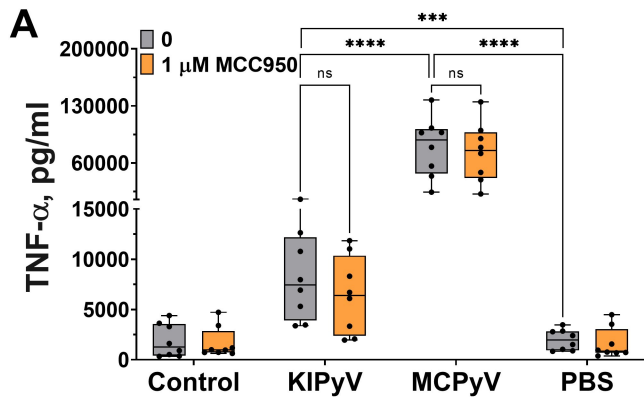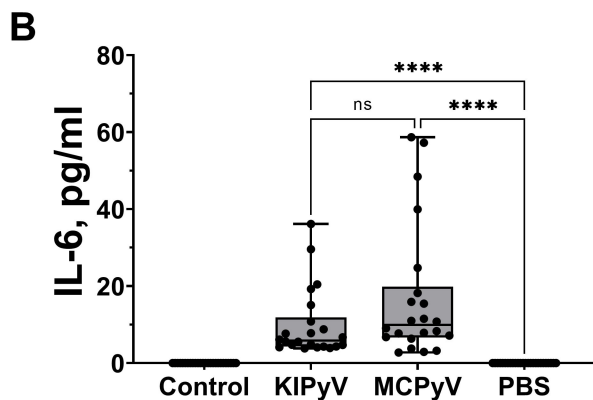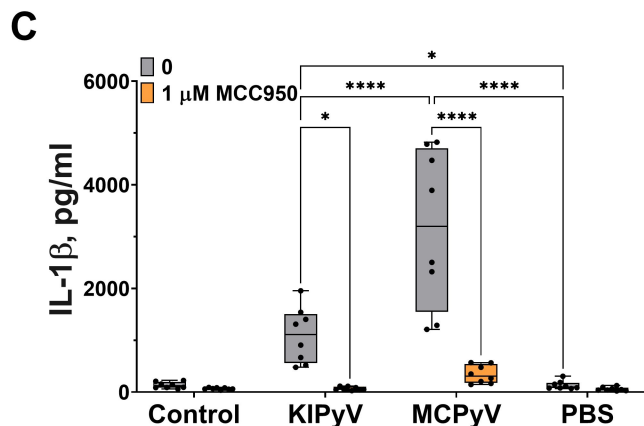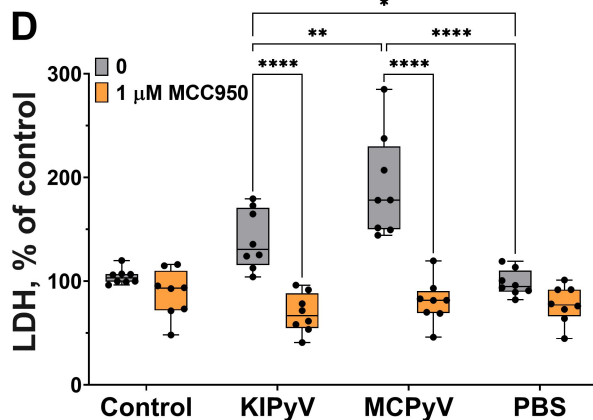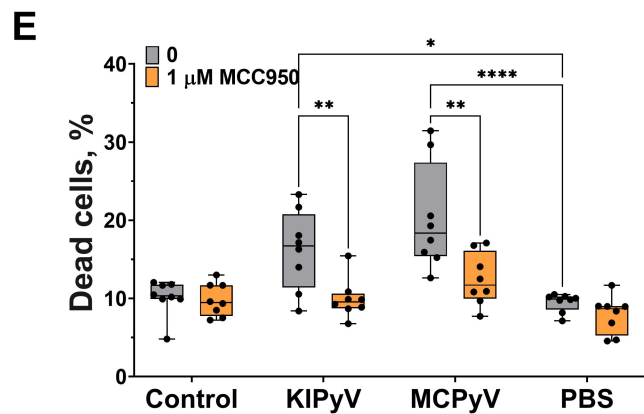

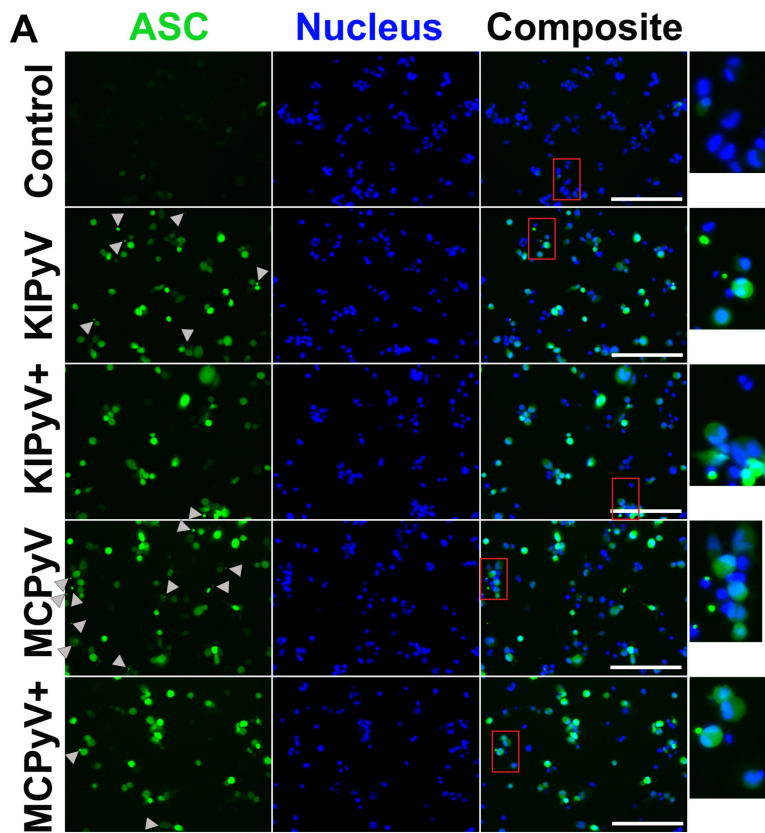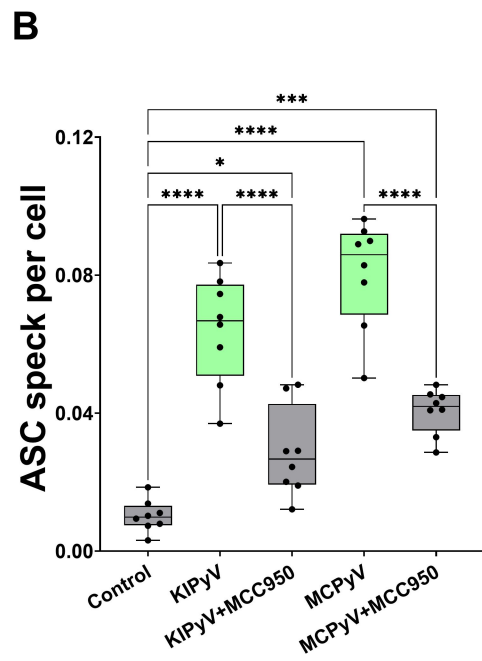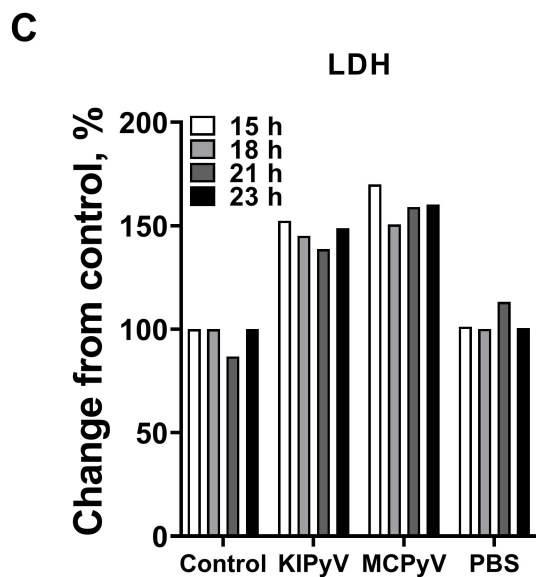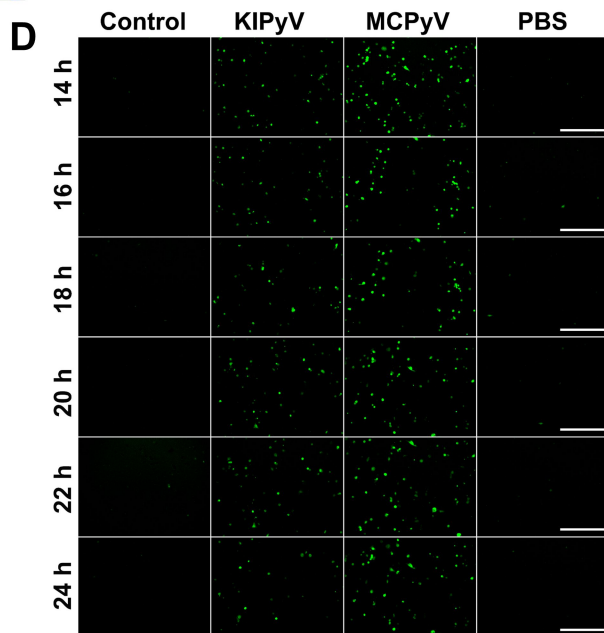



**A**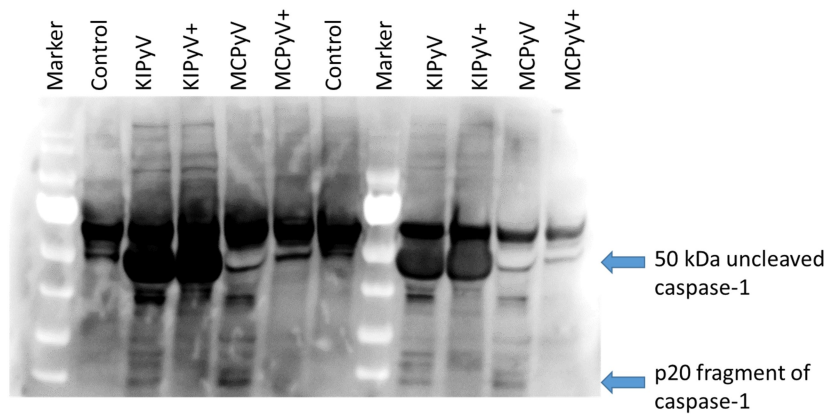**B**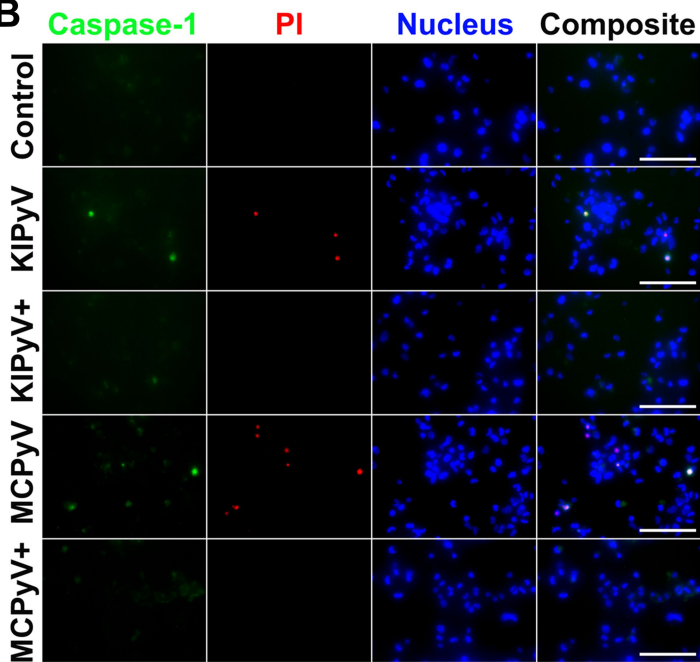**C**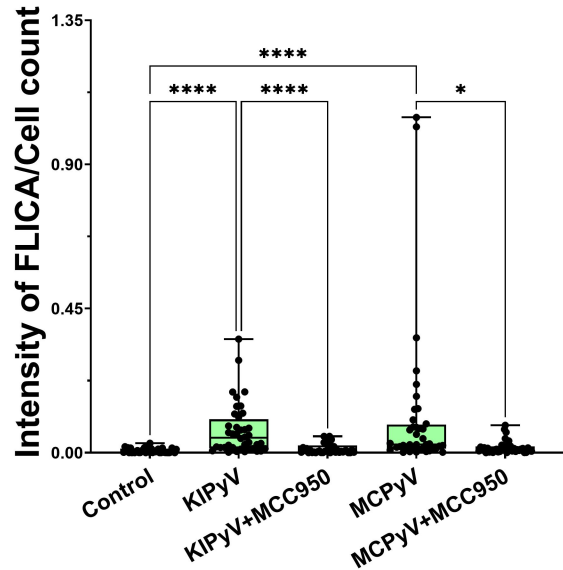

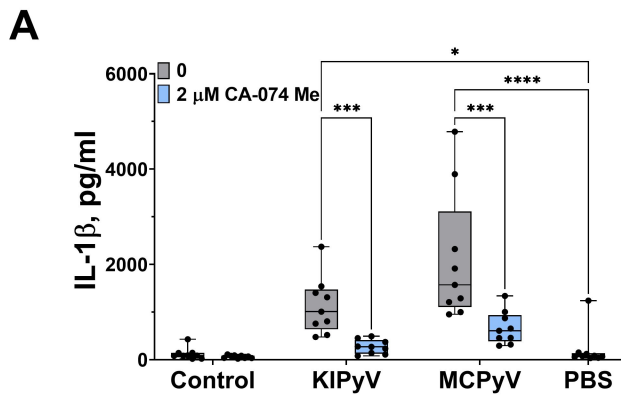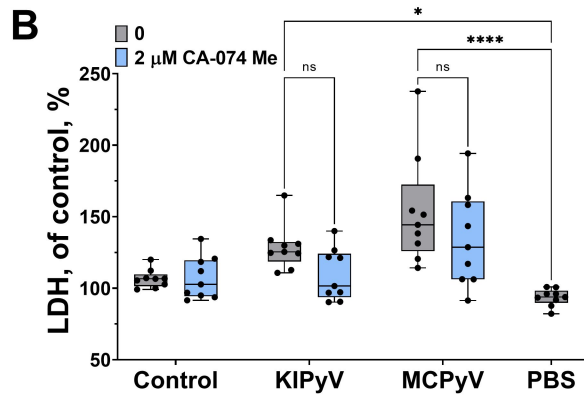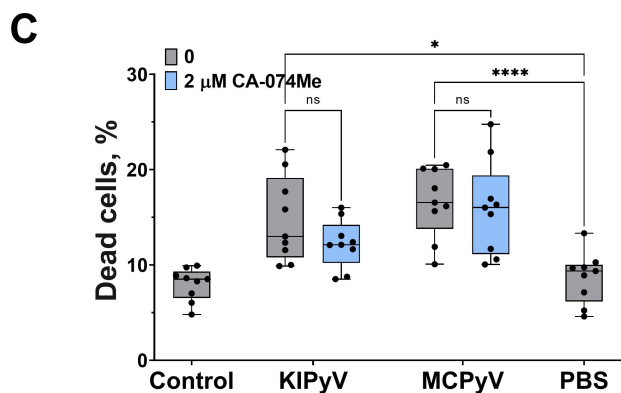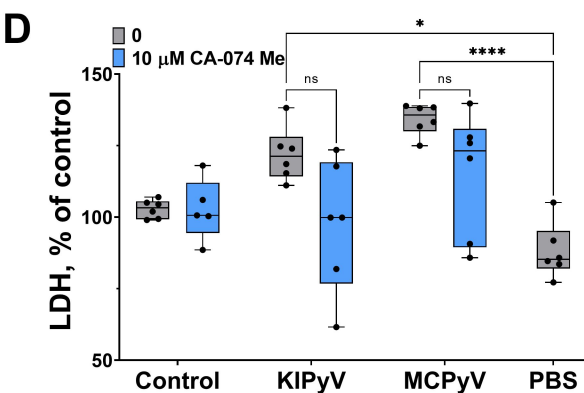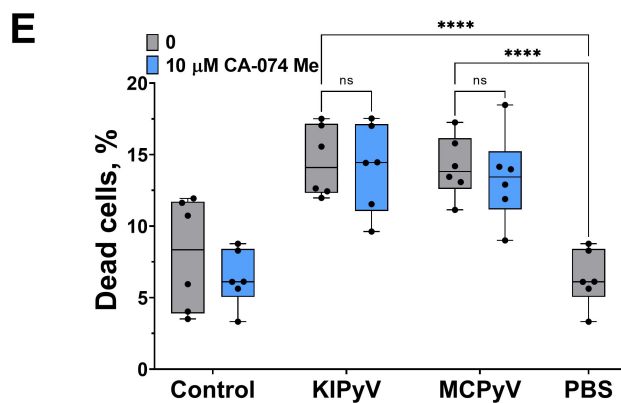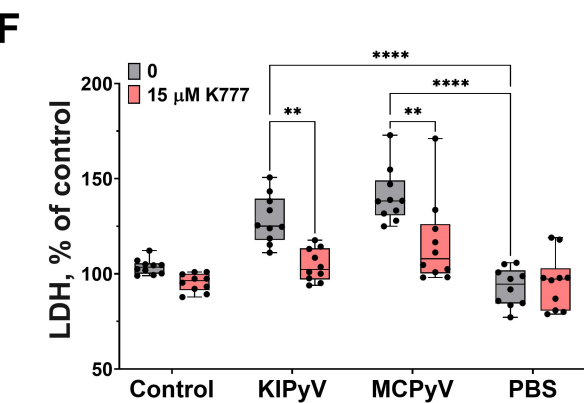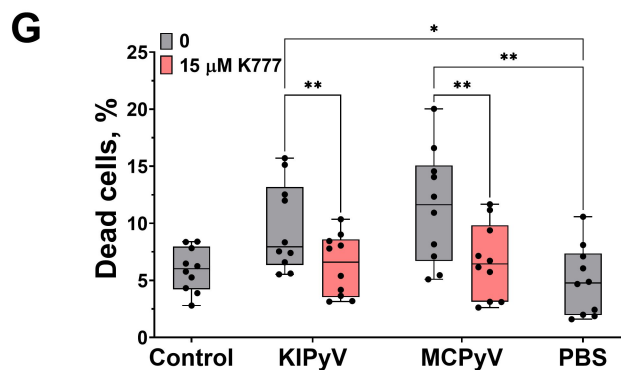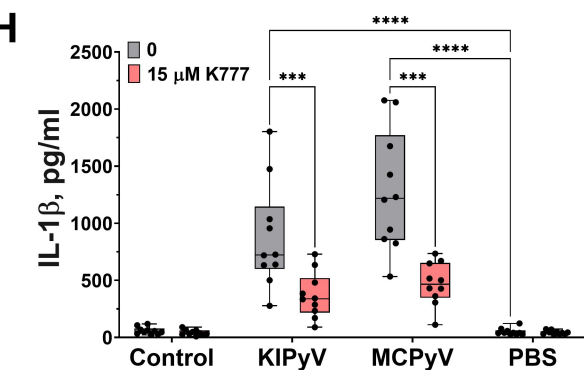

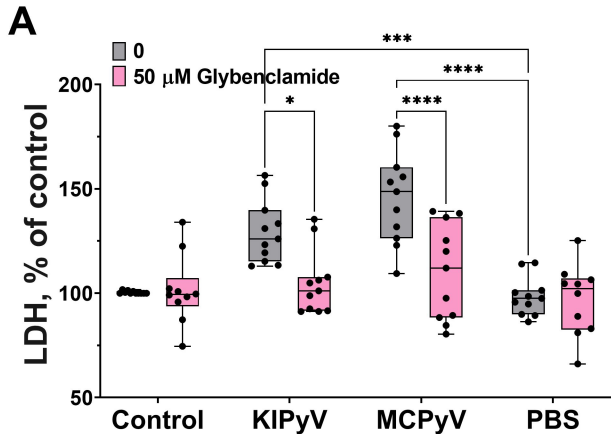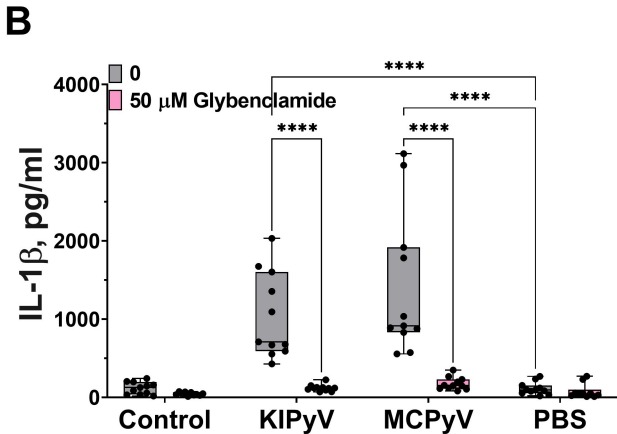

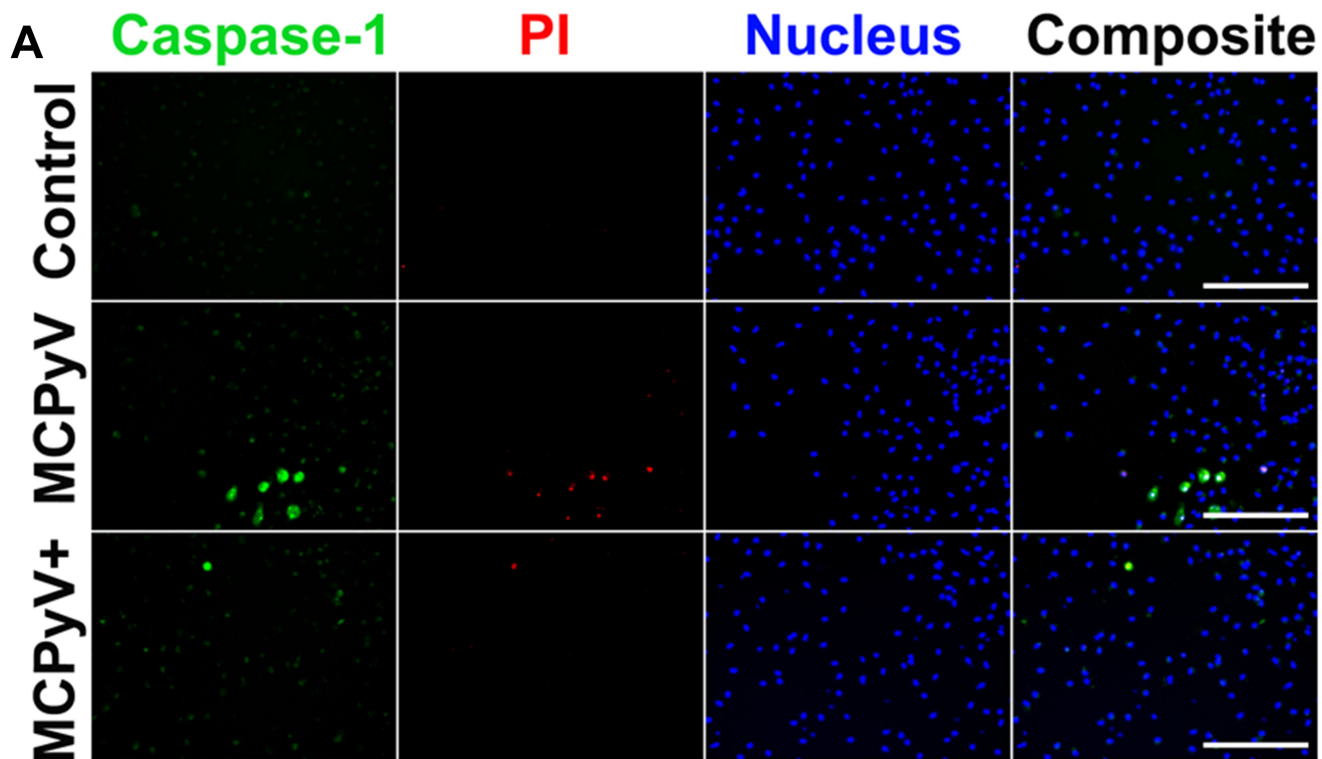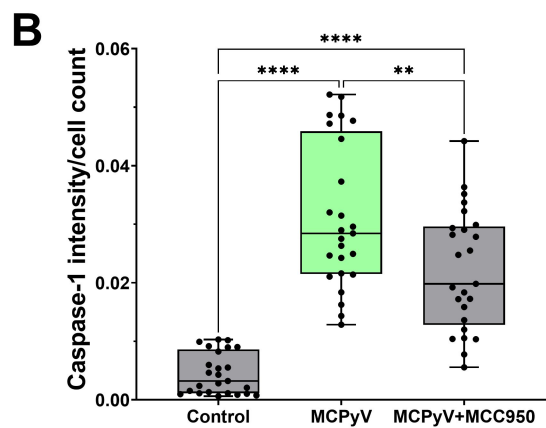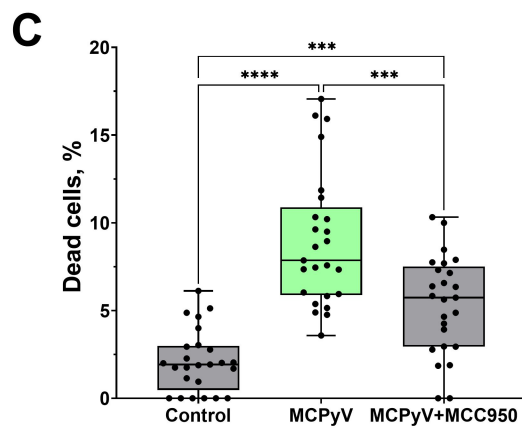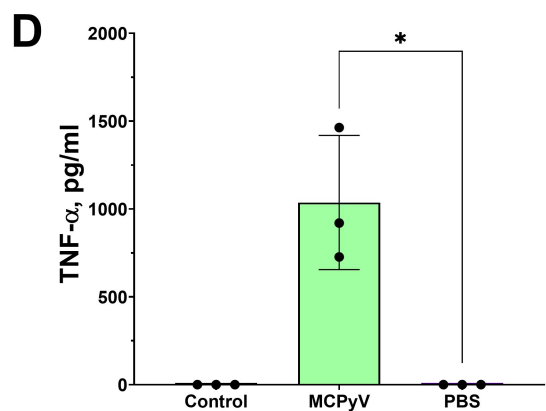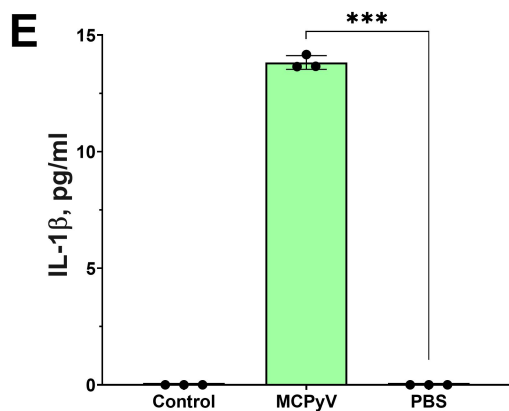



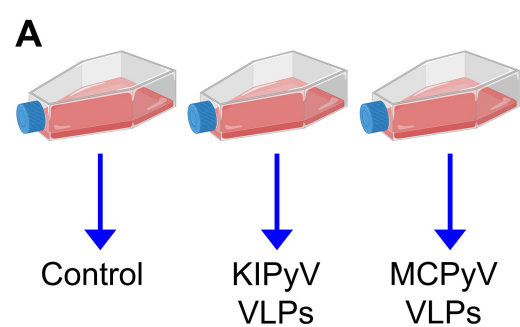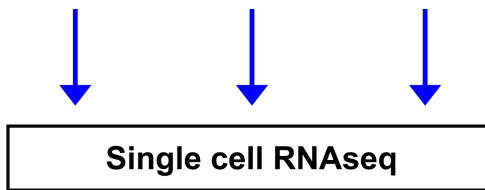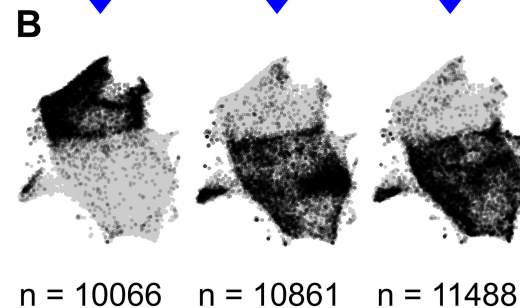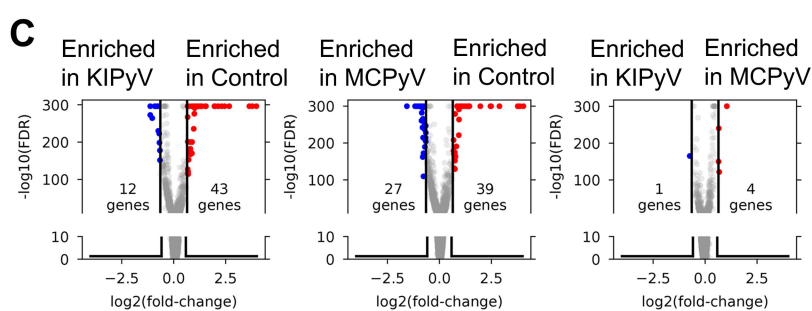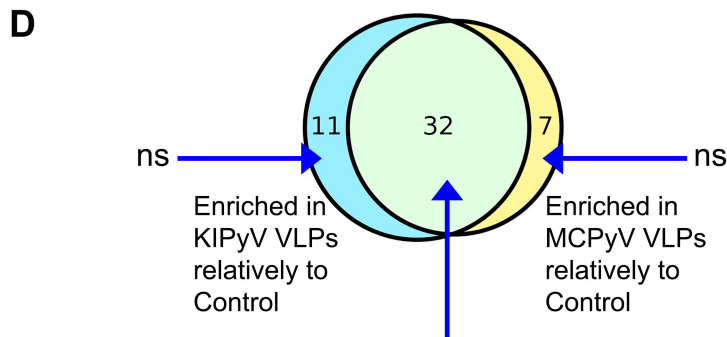

| GO term                                    | Enrichment |
|--------------------------------------------|------------|
| Neutrophil migration                       | >100       |
| Granulocyte chemotaxis                     | >100       |
| Cellular response to tumor necrosis factor | 88.64      |
| Response to interleukin-1                  | 86.53      |
| Lymphocyte migration                       | 84.13      |

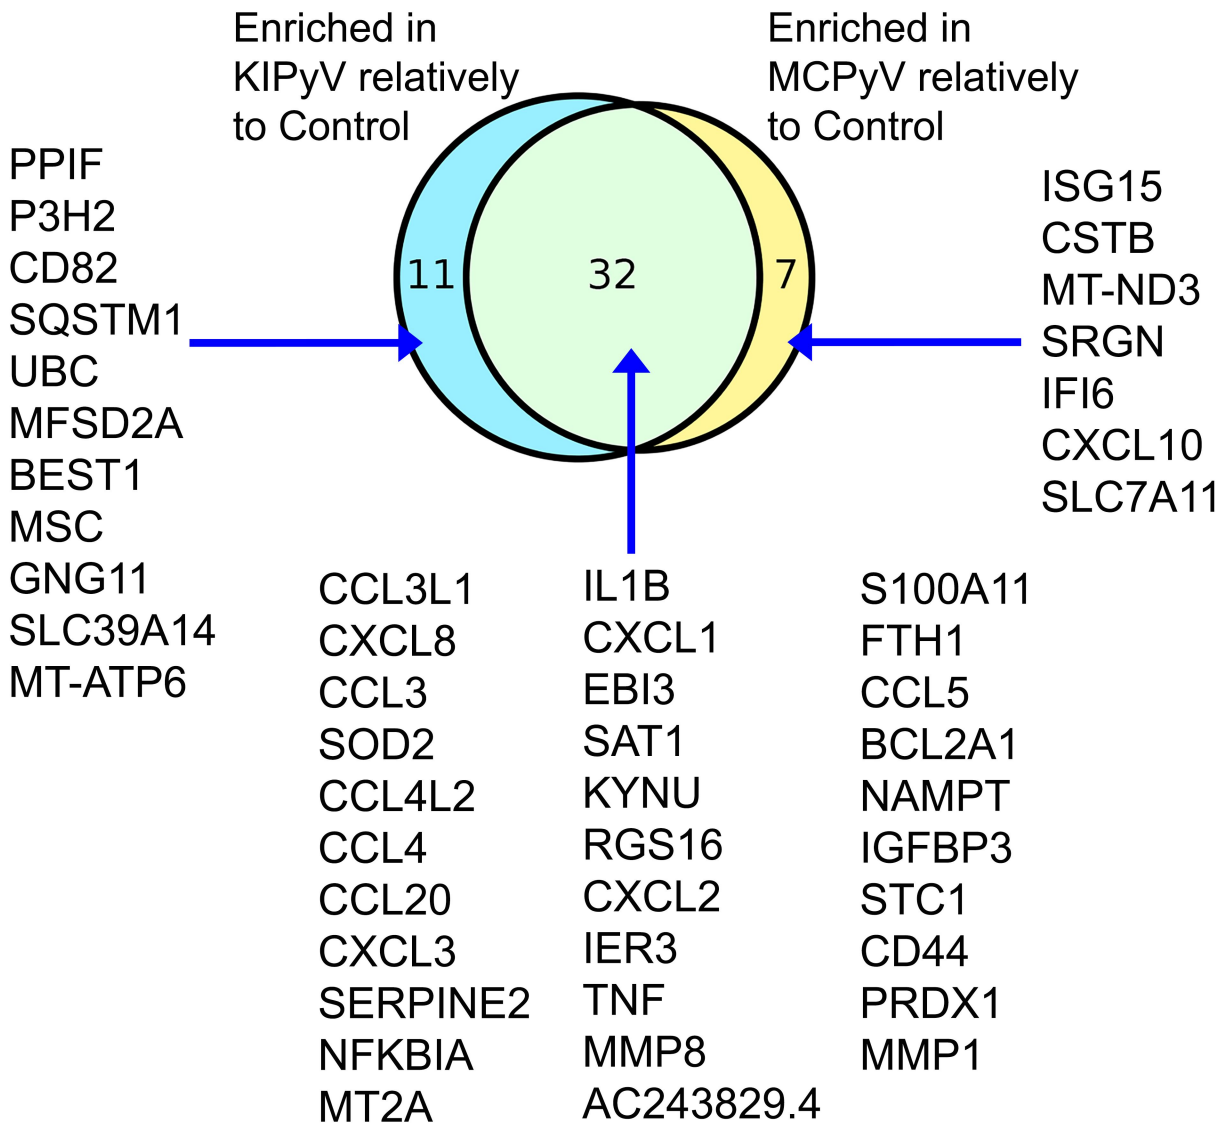

**A**

All conditions combined

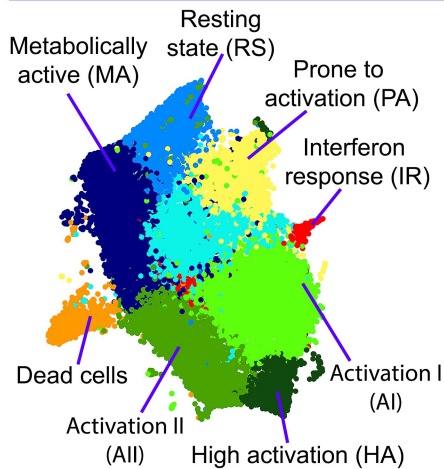

Split by condition

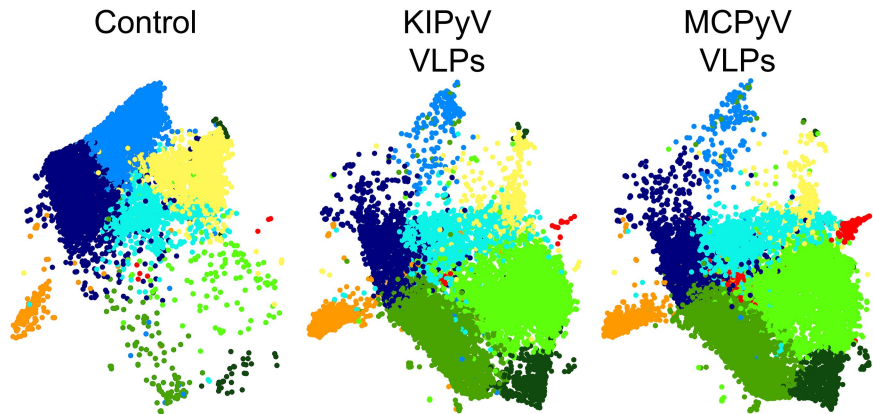**B**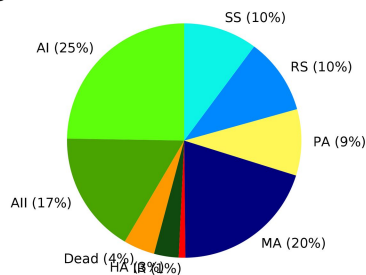**C**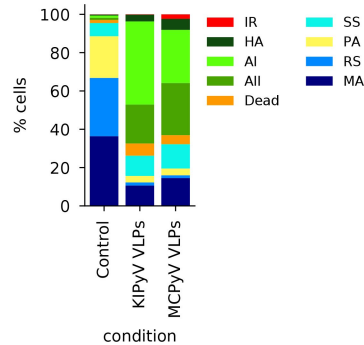**D**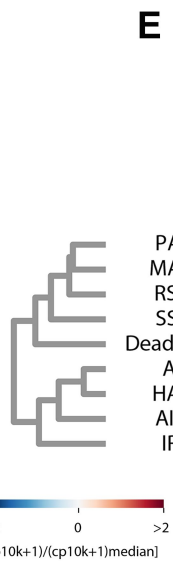**E****Enriched GO terms:**

cellular response to lipopolysaccharide  
neutrophil migration  
granulocyte chemotaxis  
antimicrobial humoral immune response  
mediated by antimicrobial peptide  
response to interleukin-1  
...

**Enriched GO term:**

defense response to virus

No significantly enriched GO terms

No significantly enriched GO terms

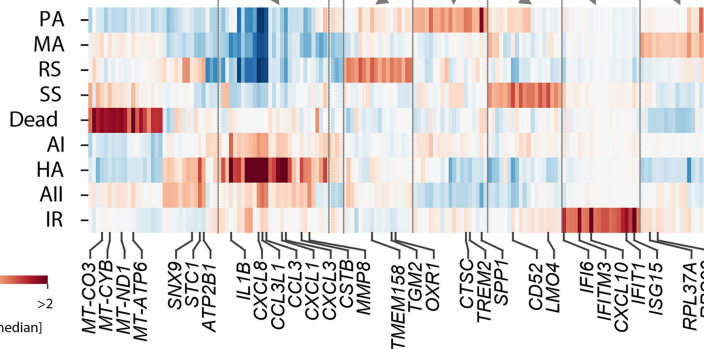**F**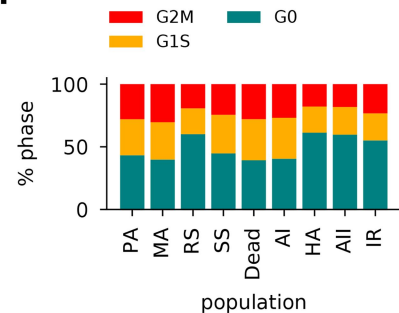**G**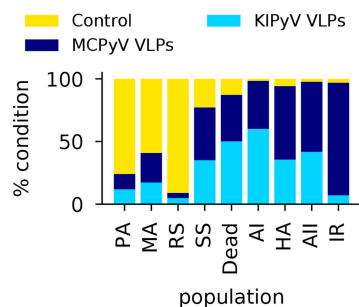

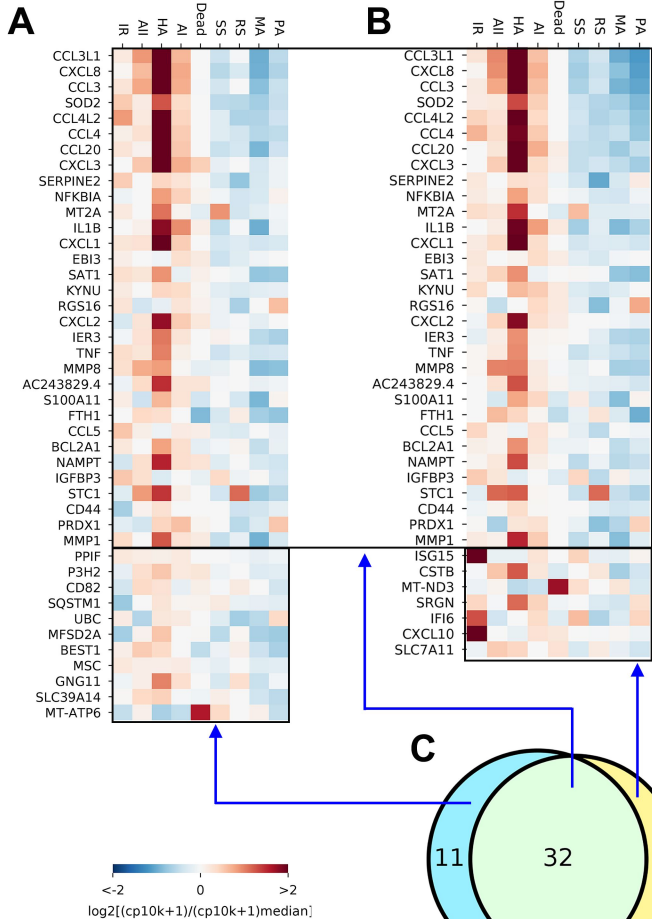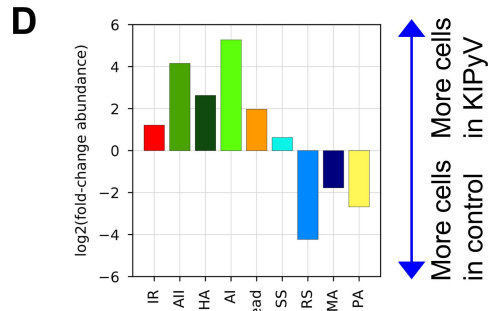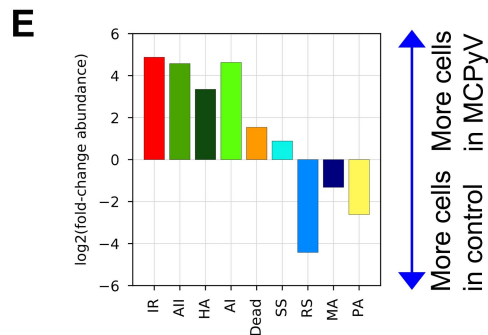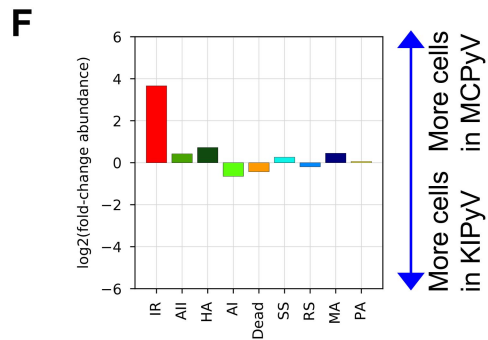



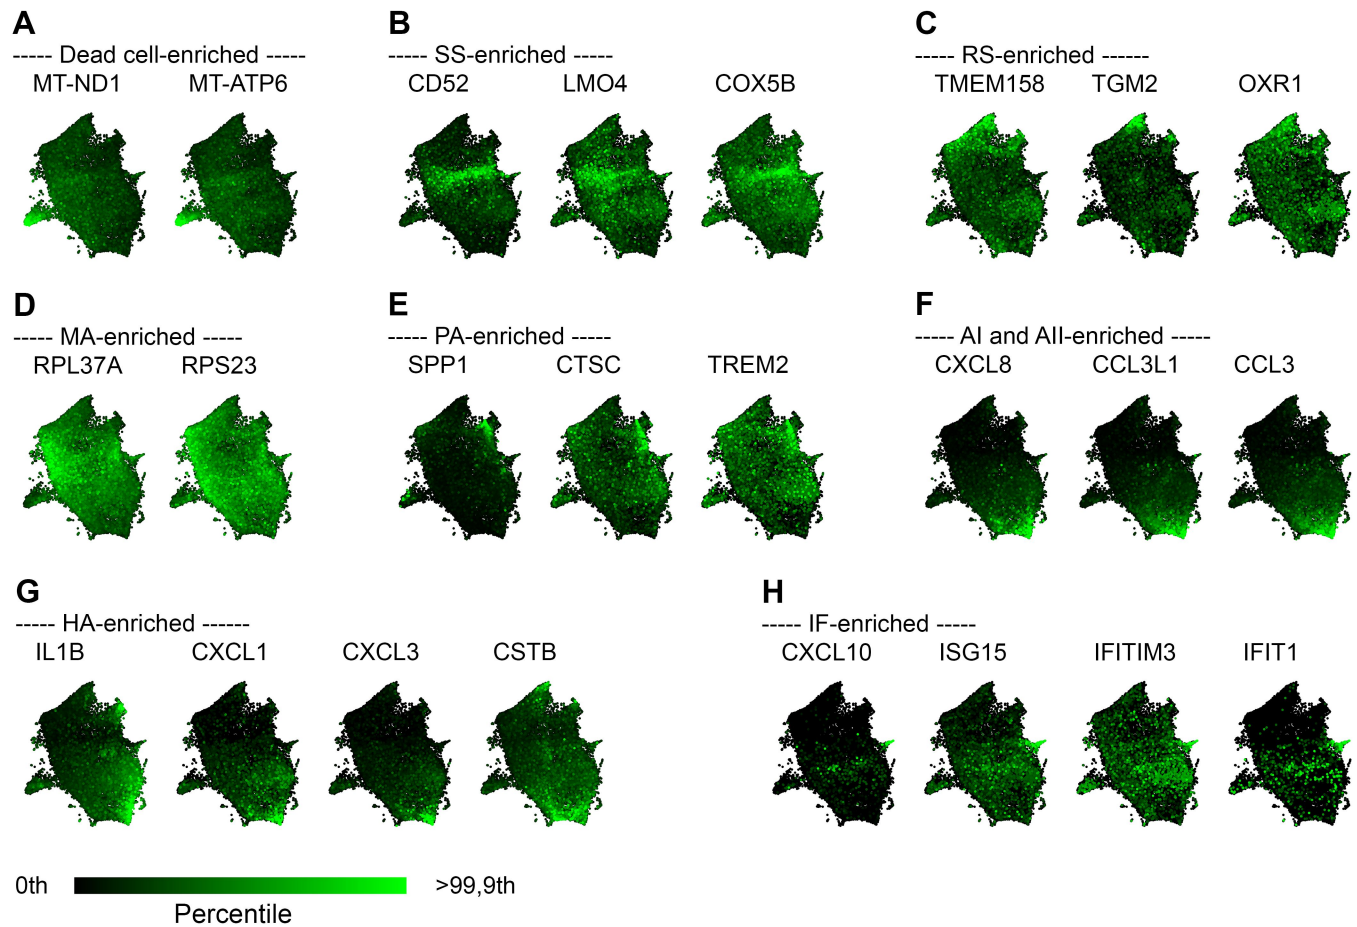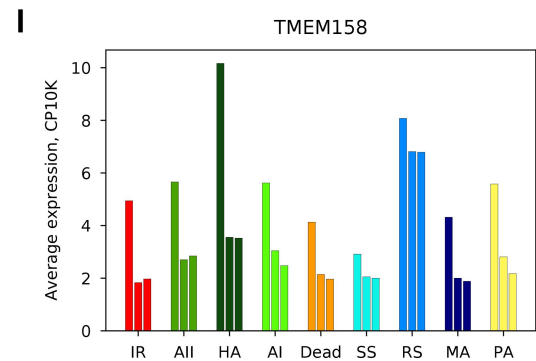

**A****IL1B**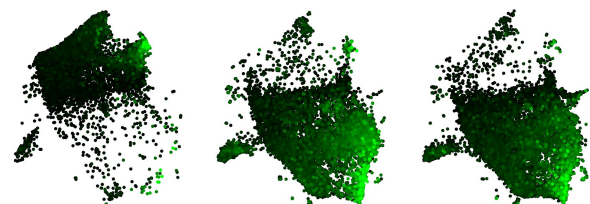**CXCL1**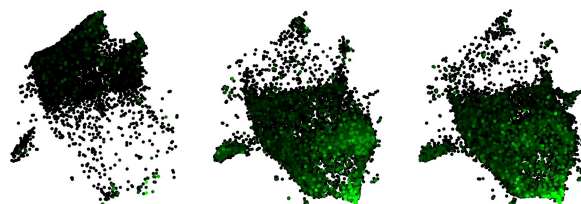**CCL3**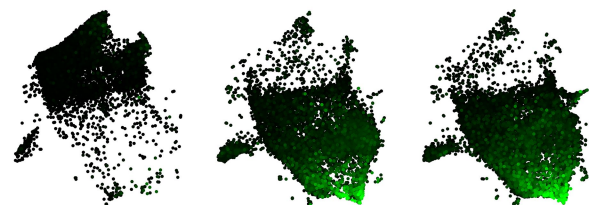

Control

KIPyV

MCPyV

**CXCL8**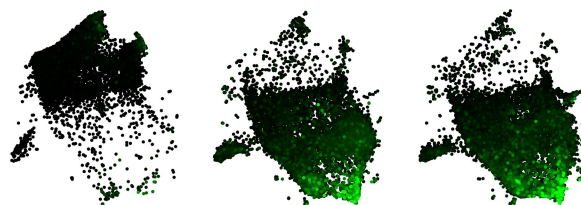

Control

KIPyV

MCPyV

**B****CXCL10**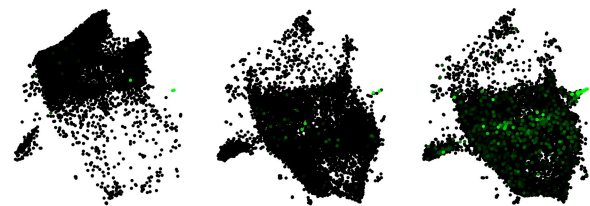**CXCL11**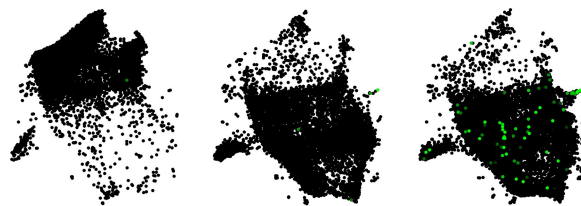**IFIT1**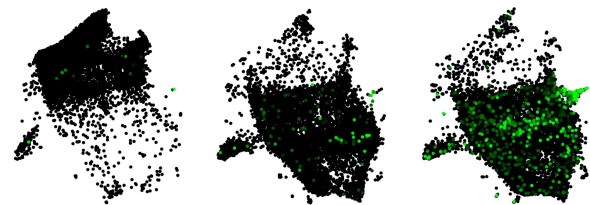

Control

KIPyV

MCPyV

**ISG15**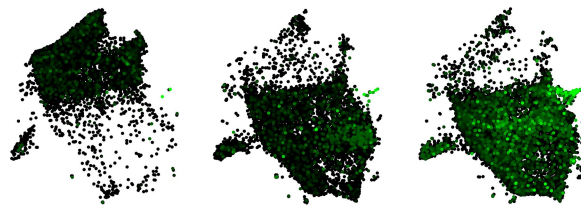

Control

KIPyV

MCPyV

0th  >99,9th  
Percentile

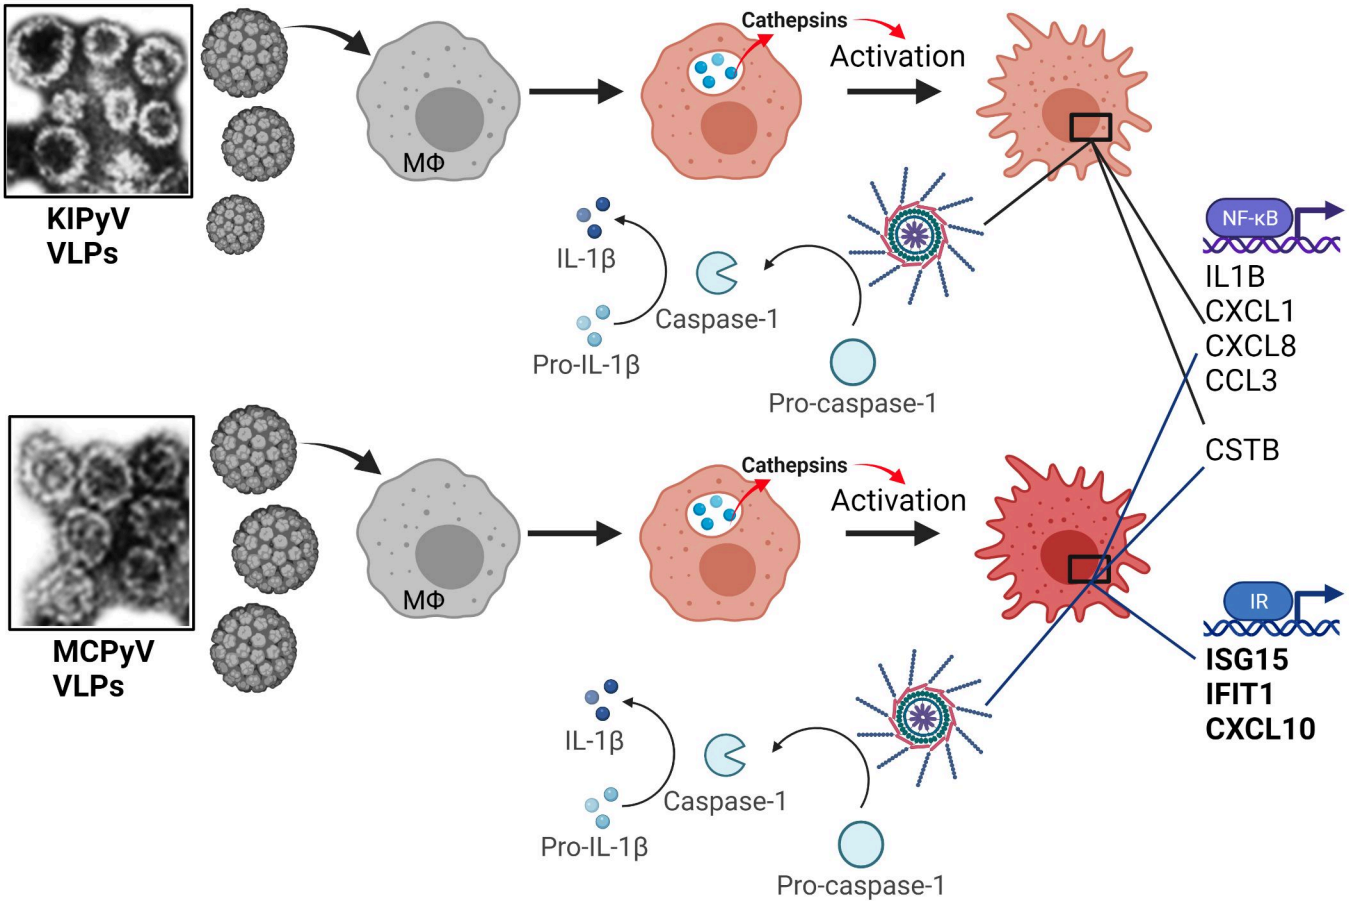

Source: https://www.biorxiv.org/content/10.1101/2021.11.15.468577v1.full.pdf
